# Supplementary material
Source: PubMed Central journal article supplement (PMC6108045)
Supplement: MSJ721356_supplementary_figure_1.pdf [file MSJ721356_supplementary_figure_1.pdf]

# Supplementary Figure 1

|            |                 | cg16936953 | cg12054453 | cg01409343 | cg18942579 | cg02782634 | cg14032089 | cg27023597 | cg04276626 | cg02515217 | cg15759721 | cg07181702 | Pearson r |
|------------|-----------------|------------|------------|------------|------------|------------|------------|------------|------------|------------|------------|------------|-----------|
| cg16936953 | VMP1 (Exon)     | 1,00       | 0,89       | 0,94       | 0,93       | 0,90       | 0,89       | 0,90       | 0,82       | 0,94       | 0,92       | 0,89       | 0,00      |
| cg12054453 | VMP1 (Exon)     | 0,89       | 1,00       | 0,88       | 0,87       | 0,74       | 0,73       | 0,82       | 0,67       | 0,82       | 0,76       | 0,75       | 0,10      |
| cg01409343 | VMP1 (Exon)     | 0,94       | 0,88       | 1,00       | 0,92       | 0,81       | 0,83       | 0,87       | 0,74       | 0,89       | 0,85       | 0,86       | 0,20      |
| cg18942579 | VMP1 (Intron)   | 0,93       | 0,87       | 0,92       | 1,00       | 0,83       | 0,79       | 0,89       | 0,72       | 0,87       | 0,85       | 0,83       | 0,30      |
| cg02782634 | VMP1 (Intron)   | 0,90       | 0,74       | 0,81       | 0,83       | 1,00       | 0,89       | 0,78       | 0,91       | 0,91       | 0,96       | 0,91       | 0,40      |
| cg14032089 | MIR21 (TSS1500) | 0,89       | 0,73       | 0,83       | 0,79       | 0,89       | 1,00       | 0,81       | 0,87       | 0,91       | 0,91       | 0,87       | 0,50      |
| cg27023597 | MIR21 (TSS1500) | 0,90       | 0,82       | 0,87       | 0,89       | 0,78       | 0,81       | 1,00       | 0,73       | 0,87       | 0,83       | 0,84       | 0,60      |
| cg04276626 | MIR21 (TSS200)  | 0,82       | 0,67       | 0,74       | 0,72       | 0,91       | 0,87       | 0,73       | 1,00       | 0,87       | 0,91       | 0,86       | 0,70      |
| cg02515217 | MIR21 (TSS200)  | 0,94       | 0,82       | 0,89       | 0,87       | 0,91       | 0,91       | 0,87       | 0,87       | 1,00       | 0,92       | 0,94       | 0,80      |
| cg15759721 | MIR21 (Body)    | 0,92       | 0,76       | 0,85       | 0,85       | 0,96       | 0,91       | 0,83       | 0,91       | 0,92       | 1,00       | 0,92       | 0,90      |
| cg07181702 | MIR21 (Body)    | 0,89       | 0,75       | 0,86       | 0,83       | 0,91       | 0,87       | 0,84       | 0,86       | 0,94       | 0,92       | 1,00       | 1,00      |

## Supplementary Figure 1: Correlation between DNA methylation levels at 11 CpGs in the region.

Analysis was performed on  $\beta$ -values from RR-MS, SP-MS and HC (n=32) using the Pearson correlation test and Pearson's r is displayed.
