# Supplementary material
Source: PubMed Central journal article supplement (PMC6108045)
Supplement: MSJ721356_supplementary_table_2.pdf [file MSJ721356_supplementary_table_2.pdf]

**Supplementary Table 2: Differential expression in CD4+ T cells of predicted miR-21 target genes between RR-MS and HC. Genes identified as miR-21 targets**

**in Jurkat T cells by RIP-Chip and genes predicted and experimentally validated to be miR-21 targets by TarBase7.0 were selected for investigation.**

| Jurkat target ID | Gene Name   | Description                                                                 | logF<br>C | AveExp<br>r | P.Value  |
|------------------|-------------|-----------------------------------------------------------------------------|-----------|-------------|----------|
| ENSG00000180667  | <b>YOD1</b> | YOD1 deubiquitinase<br>[Source:HGNC Symbol;Acc:HGNC:25035]                  | 0.30      | 5.09        | 3.28E-04 |
| ENSG00000100354  | TNRC6B      | trinucleotide repeat containing 6B<br>[Source:HGNC Symbol;Acc:HGNC:29190]   | 0.13      | 6.71        | 4.99E-03 |
| ENSG00000146676  | <b>PURB</b> | purine rich element binding protein B<br>[Source:HGNC Symbol;Acc:HGNC:9702] | 0.17      | 5.75        | 9.29E-03 |
| ENSG00000145715  | RASA1       | RAS p21 protein                                                             | 0.17      | 6.59        | 1.23E-02 |

| TarBase7.0 target ID | Gene Name   | Description                                                         | logF<br>C | AveExp<br>r | P.Value  |
|----------------------|-------------|---------------------------------------------------------------------|-----------|-------------|----------|
| ENSG00000164284      | GRPEL2      | GrpE like 2, mitochondrial<br>[Source:HGNC Symbol;Acc:HGNC:21060]   | 0.44      | 5.87        | 6.63E-05 |
| ENSG00000180667      | <b>YOD1</b> | YOD1 deubiquitinase<br>[Source:HGNC Symbol;Acc:HGNC:25035]          | 0.30      | 5.09        | 3.28E-04 |
| ENSG00000113369      | ARRDC3      | arrestin domain containing 3<br>[Source:HGNC Symbol;Acc:HGNC:29263] | 0.44      | 8.17        | 7.68E-04 |
| ENSG00000143753      | DEGS1       | delta 4-desaturase,                                                 | 0.21      | 6.40        | 2.74E-03 |

|                 |               |                                                                                                                                                                     |           |       |          |  |  |  |  |
|-----------------|---------------|---------------------------------------------------------------------------------------------------------------------------------------------------------------------|-----------|-------|----------|--|--|--|--|
| ENSG00000110987 | <b>BCL7A</b>  | activator 1<br>[Source:HGNC<br>Symbol;Acc:<br>HGNC:9871]<br><br>BCL tumor<br>suppressor<br>7A<br>[Source:HGNC<br>Symbol;Acc:<br>HGNC:1004]                          | 0.63      | 2.13  | 2.20E-02 |  |  |  |  |
| ENSG00000197579 | <b>TOPORS</b> | TOP1<br>binding<br>arginine/seri<br>ne rich<br>protein<br>[Source:HGNC<br>Symbol;Acc:<br>HGNC:21653<br>]                                                            | 0.12      | 5.20  | 3.33E-02 |  |  |  |  |
| ENSG00000152518 | ZFP36L2       | ZFP36 ring<br>finger<br>protein like 2<br>[Source:HGNC<br>Symbol;Acc:<br>HGNC:1108]                                                                                 | 0.18      | 11.05 | 3.64E-02 |  |  |  |  |
| ENSG00000180979 | LRRCS7        | sphingolipid<br>1<br>[Source:HGNC<br>Symbol;Acc:<br>HGNC:1370<br>9]<br>leucine rich<br>repeat<br>containing<br>57<br>[Source:HGNC<br>Symbol;Acc:<br>HGNC:2671<br>9] | 0.33      | 5.02  | 4.09E-03 |  |  |  |  |
| ENSG00000150753 | CCT5          | chaperonin<br>containing<br>TCP1<br>subunit 5<br>[Source:HGNC<br>Symbol;Acc:<br>HGNC:1618]                                                                          | -<br>0.17 | 6.06  | 4.97E-03 |  |  |  |  |
| ENSG00000253719 | ATXN7L3B      | ataxin 7 like<br>3B<br>[Source:HGNC<br>Symbol;Acc:<br>HGNC:3793<br>1]                                                                                               | 0.17      | 8.07  | 5.66E-03 |  |  |  |  |

|                 |               |                                                                                 |           |      |          |
|-----------------|---------------|---------------------------------------------------------------------------------|-----------|------|----------|
| ENSG00000131023 | <b>LATS1</b>  | large tumor suppressor kinase 1<br>[Source:HGNC<br>Symbol;Acc:<br>HGNC:6514]    | -<br>0.07 | 5.87 | 3.88E-02 |
| ENSG00000124209 | <b>RAB22A</b> | RAB22A, member RAS oncogene family<br>[Source:HGNC<br>Symbol;Acc:<br>HGNC:9764] | 0.11      | 4.57 | 4.50E-02 |
| ENSG00000138336 | <b>TET1</b>   | tet methylcytosine dioxygenase 1<br>[Source:HGNC<br>Symbol;Acc:<br>HGNC:29484]  | -<br>0.26 | 1.57 | 4.81E-02 |
| ENSG00000076641 | <b>PAG1</b>   | phosphoprotein membrane anchor with glycosphingolipid microdomain               | 0.18      | 8.28 | 7.03E-02 |

|                 |              |                                                                                    |           |      |          |
|-----------------|--------------|------------------------------------------------------------------------------------|-----------|------|----------|
| ENSG00000131381 | <b>RBSN</b>  | rabenosyn, RAB effector<br>[Source:HGNC<br>Symbol;Acc:<br>HGNC:20759]              | 0.13      | 5.61 | 7.10E-03 |
| ENSG00000141582 | <b>CBX4</b>  | chromobox 4<br>[Source:HGNC<br>Symbol;Acc:<br>HGNC:1554]                           | 0.22      | 6.52 | 9.03E-03 |
| ENSG00000146676 | <b>PURB</b>  | purine rich element binding protein B<br>[Source:HGNC<br>Symbol;Acc:<br>HGNC:9702] | 0.17      | 5.75 | 9.29E-03 |
| ENSG00000119844 | <b>AFTPH</b> | aftiphilin<br>[Source:HGNC<br>Symbol;Acc:<br>HGNC:25951]                           | -<br>0.14 | 6.05 | 1.24E-02 |

|                     |               |                                                                                                                                                |      |      |              |                 |        |                                                                                                        |      |      |              |
|---------------------|---------------|------------------------------------------------------------------------------------------------------------------------------------------------|------|------|--------------|-----------------|--------|--------------------------------------------------------------------------------------------------------|------|------|--------------|
| ENSG0000016524<br>4 | <b>ZNF367</b> | ns 1<br>[Source:HGN<br>C<br>Symbol;Acc:<br>HGNC:30043<br>]<br>zinc finger<br>protein 367<br>[Source:HGN<br>C<br>Symbol;Acc:<br>HGNC:18320<br>] | 0.16 | 3.85 | 7.29E-<br>02 | ENSG00000118402 | ELOVL4 | ELOVL fatty<br>acid<br>elongase 4<br>[Source:HG<br>NC<br>Symbol;Acc:<br>HGNC:1441<br>5]                | 0.61 | 2.44 | 1.48E-<br>02 |
| ENSG0000015252<br>0 | PAN3          | PAN3<br>poly(A)<br>specific<br>ribonuclease<br>subunit<br>[Source:HGN<br>C<br>Symbol;Acc:<br>HGNC:29991<br>]                                   | 0.09 | 7.10 | 7.60E-<br>02 | ENSG00000164466 | SFXN1  | sideroflexin<br>1<br>[Source:HG<br>NC<br>Symbol;Acc:<br>HGNC:1608<br>5]                                | 0.14 | 6.23 | 1.49E-<br>02 |
| ENSG0000016622<br>5 | <b>FRS2</b>   | fibroblast<br>growth<br>factor<br>receptor<br>substrate 2<br>[Source:HGN<br>C<br>Symbol;Acc:<br>HGNC:16971                                     | 0.08 | 4.97 | 9.50E-<br>02 | ENSG00000163629 | PTPN13 | protein<br>tyrosine<br>phosphatas<br>e, non-<br>receptor<br>type 13<br>[Source:HG<br>NC<br>Symbol;Acc: | 0.67 | 3.10 | 1.55E-<br>02 |

|                 |         |                                                                                   |       |       |          |                 |              |                                                                               |      |      |          |
|-----------------|---------|-----------------------------------------------------------------------------------|-------|-------|----------|-----------------|--------------|-------------------------------------------------------------------------------|------|------|----------|
| ENSG00000171316 | CHD7    | ] chromodomain helicase DNA binding protein 7 [Source:HGNC Symbol;Acc:HGNC:20626] | 0.14  | 5.57  | 1.10E-01 | ENSG00000104643 | MTMR9        | HGNC:9646] myotubularin related protein 9 [Source:HGNC Symbol;Acc:HGNC:14596] | 0.09 | 4.85 | 1.65E-02 |
| ENSG00000107679 | PLEKHA1 | ] pleckstrin homology domain containing A1 [Source:HGNC Symbol;Acc:HGNC:14335]    | -0.12 | 5.70  | 1.25E-01 | ENSG00000145907 | G3BP1        | G3BP stress granule assembly factor 1 [Source:HGNC Symbol;Acc:HGNC:30292]     | 0.09 | 6.92 | 1.88E-02 |
| ENSG00000171132 | PRKCE   | ] protein kinase C epsilon [Source:HGNC Symbol;Acc:HGNC:9401]                     | 0.12  | 2.63  | 1.31E-01 | ENSG00000196776 | CD47         | CD47 molecule [Source:HGNC Symbol;Acc:HGNC:1682]                              | 0.09 | 8.47 | 1.95E-02 |
| ENSG00000110848 | CD69    | ] CD69 molecule [Source:HGNC Symbol;Acc:HGNC:1694]                                | -0.19 | 10.25 | 1.42E-01 | ENSG00000110987 | <b>BCL7A</b> | BCL tumor suppressor 7A [Source:HGNC Symbol;Acc:                              | 0.63 | 2.13 | 2.20E-02 |

|                 |               |                                                                           |       |      |          |                 |         |                                                                                     |       |       |          |
|-----------------|---------------|---------------------------------------------------------------------------|-------|------|----------|-----------------|---------|-------------------------------------------------------------------------------------|-------|-------|----------|
| ENSG00000155640 | -             | -                                                                         | 0.16  | 4.26 | 1.46E-01 | ENSG00000070214 | SLC44A1 | HGNC:1004]<br>solute carrier family 44 member 1 [Source:HGNC Symbol;Acc:HGNC:18798] | -0.13 | 3.78  | 2.27E-02 |
| ENSG00000174010 | <b>KLHL15</b> | kelch like family member 15 [Source:HGNC Symbol;Acc:HGNC:29347]           | 0.12  | 4.55 | 1.48E-01 | ENSG00000173698 | ADGRG2  | adhesion G protein-coupled receptor G2 [Source:HGNC Symbol;Acc:HGNC:4516]           | -1.00 | -1.29 | 2.30E-02 |
| ENSG00000134698 | <b>AGO4</b>   | argonaute 4, RISC catalytic component [Source:HGNC Symbol;Acc:HGNC:18424] | 0.17  | 5.75 | 1.65E-01 | ENSG00000109787 | KLF3    | Kruppel like factor 3 [Source:HGNC Symbol;Acc:HGNC:16516]                           | 0.17  | 7.88  | 2.33E-02 |
| ENSG00000152601 | <b>MBNL1</b>  | muscleblind like splicing regulator 1 [Source:HGNC Symbol;Acc:            | -0.06 | 9.23 | 1.86E-01 | ENSG00000119778 | ATAD2B  | ATPase family, AAA domain containing 2B [Source:HG                                  | -0.12 | 4.38  | 2.36E-02 |

|                     |                | HGNC:6923]                                                                       |      |      |          |                 |         | NC<br>Symbol;Acc:<br>HGNC:2923<br>0]                                                               |           |      |          |
|---------------------|----------------|----------------------------------------------------------------------------------|------|------|----------|-----------------|---------|----------------------------------------------------------------------------------------------------|-----------|------|----------|
| ENSG0000019732<br>3 | <b>TRIM33</b>  | tripartite motif containing 33<br>[Source:HGNC<br>Symbol;Acc:<br>HGNC:16290<br>] | 0.04 | 6.56 | 1.95E-01 | ENSG00000185658 | BRWD1   | bromodomain and WD repeat domain containing 1<br>[Source:HGNC<br>Symbol;Acc:<br>HGNC:1276<br>0]    | 0.10      | 6.29 | 2.41E-02 |
| ENSG0000013859<br>3 | SECISBP2L      | SECIS binding protein 2 like<br>[Source:HGNC<br>Symbol;Acc:<br>HGNC:28997<br>]   | 0.05 | 6.04 | 1.96E-01 | ENSG00000158079 | PTPDC1  | protein tyrosine phosphatase domain containing 1<br>[Source:HGNC<br>Symbol;Acc:<br>HGNC:3018<br>4] | -<br>0.19 | 3.27 | 2.52E-02 |
| ENSG0000016259<br>9 | NFIA           | nuclear factor I A<br>[Source:HGNC<br>Symbol;Acc:<br>HGNC:7784]                  | 0.13 | 1.27 | 2.43E-01 | ENSG00000096060 | FKBP5   | FK506 binding protein 5<br>[Source:HGNC<br>Symbol;Acc:<br>HGNC:3721]                               | 0.31      | 6.88 | 2.56E-02 |
| ENSG0000017718<br>9 | <b>RPS6KA3</b> | ribosomal protein S6                                                             | 0.06 | 7.43 | 2.83E-01 | ENSG00000119899 | SLC17A5 | solute carrier                                                                                     | 0.14      | 4.31 | 2.74E-02 |

|                 |               |                                                                                            |      |      |          |                 |         |                                                                                                       |           |      |          |
|-----------------|---------------|--------------------------------------------------------------------------------------------|------|------|----------|-----------------|---------|-------------------------------------------------------------------------------------------------------|-----------|------|----------|
| ENSG00000188895 | MSL1          | kinase A3<br>[Source:HGN<br>C<br>Symbol;Acc:<br>HGNC:10432<br>]                            | 0.07 | 7.40 | 2.87E-01 | ENSG00000196459 | TRAPPC2 | family 17<br>member 5<br>[Source:HG<br>NC<br>Symbol;Acc:<br>HGNC:1093<br>3]                           | 0.11      | 5.06 | 3.06E-02 |
| ENSG00000118922 | KLF12         | male specific<br>lethal 1<br>homolog<br>[Source:HGN<br>C<br>Symbol;Acc:<br>HGNC:27905<br>] | 0.05 | 7.01 | 2.98E-01 | ENSG00000100664 | EIF5    | trafficking<br>protein<br>particle<br>complex 2<br>[Source:HG<br>NC<br>Symbol;Acc:<br>HGNC:2306<br>8] | 0.13      | 7.55 | 3.10E-02 |
| ENSG00000181690 | <b>PLAG1</b>  | Kruppel like<br>factor 12<br>[Source:HGN<br>C<br>Symbol;Acc:<br>HGNC:6346]                 | 0.14 | 4.53 | 2.99E-01 | ENSG00000143013 | LMO4    | eukaryotic<br>translation<br>initiation<br>factor 5<br>[Source:HG<br>NC<br>Symbol;Acc:<br>HGNC:3299]  | 0.33      | 4.30 | 3.20E-02 |
| ENSG00000162378 | <b>ZYG11B</b> | PLAG1 zinc<br>finger<br>[Source:HGN<br>C<br>Symbol;Acc:<br>HGNC:9045]                      | 0.05 | 5.21 | 3.05E-01 | ENSG00000164190 | NIPBL   | LIM domain<br>only 4<br>[Source:HG<br>NC<br>Symbol;Acc:<br>HGNC:6644]                                 | -<br>0.07 | 6.49 | 3.25E-02 |



|                 |               |                                                                                                                                                                             |           |      |          |  |           |      |          |
|-----------------|---------------|-----------------------------------------------------------------------------------------------------------------------------------------------------------------------------|-----------|------|----------|--|-----------|------|----------|
| ENSG00000204217 | <b>BMPR2</b>  | regulator<br>[Source:HGN<br>C<br>Symbol;Acc:<br>HGNC:25820<br>]<br>bone<br>morphogene<br>tic protein<br>receptor<br>type 2<br>[Source:HGN<br>C<br>Symbol;Acc:<br>HGNC:1078] | 0.06      | 4.33 | 3.20E-01 |  |           |      |          |
| ENSG00000081014 | <b>AP4E1</b>  | adaptor<br>related<br>protein<br>complex 4<br>epsilon 1<br>subunit<br>[Source:HGN<br>C<br>Symbol;Acc:<br>HGNC:573]                                                          | -<br>0.04 | 4.62 | 3.29E-01 |  | 0.12      | 4.84 | 3.29E-02 |
| ENSG00000185009 | <b>AP3M1</b>  | adaptor<br>related<br>protein<br>complex 3<br>mu 1 subunit<br>[Source:HGN<br>C<br>Symbol;Acc:                                                                               | -<br>0.04 | 5.67 | 3.68E-01 |  |           |      |          |
| ENSG00000048471 | <b>SNX29</b>  | factor<br>[Source:HG<br>NC<br>Symbol;Acc:<br>HGNC:2886<br>2]<br>sorting<br>nexin 29<br>[Source:HG<br>NC<br>Symbol;Acc:<br>HGNC:3054<br>2]                                   |           |      |          |  | 0.12      | 4.84 | 3.29E-02 |
| ENSG00000197579 | <b>TOPORS</b> | TOP1<br>binding<br>arginine/ser<br>ine rich<br>protein<br>[Source:HG<br>NC<br>Symbol;Acc:<br>HGNC:2165<br>3]                                                                |           |      |          |  | 0.12      | 5.20 | 3.33E-02 |
| ENSG00000127337 | <b>YEATS4</b> | YEATS<br>domain<br>containing 4<br>[Source:HG<br>NC<br>Symbol;Acc:<br>HGNC:2485<br>9]                                                                                       |           |      |          |  | -<br>0.25 | 5.66 | 3.42E-02 |

|                 |               |                                                                                                           |      |      |          |                 |              |                                                                                                                |       |      |          |
|-----------------|---------------|-----------------------------------------------------------------------------------------------------------|------|------|----------|-----------------|--------------|----------------------------------------------------------------------------------------------------------------|-------|------|----------|
| ENSG00000107864 | <b>CPEB3</b>  | HGNC:569]<br>cytoplasmic polyadenylation element binding protein 3<br>[Source:HGNC Symbol;Acc:HGNC:21746] | 0.07 | 2.84 | 3.74E-01 | ENSG00000196262 | PPIA         | peptidylprolyl isomerase A<br>[Source:HGNC Symbol;Acc:HGNC:9253]                                               | 0.11  | 8.48 | 3.71E-02 |
| ENSG00000150593 | <b>PDCD4</b>  | programmed cell death 4 (neoplastic transformation inhibitor)<br>[Source:HGNC Symbol;Acc:HGNC:8763]       | 0.05 | 8.46 | 3.90E-01 | ENSG00000092871 | RFFL         | ring finger and FYVE-like domain containing E3 ubiquitin protein ligase<br>[Source:HGNC Symbol;Acc:HGNC:24821] | 0.11  | 5.60 | 3.76E-02 |
| ENSG00000143756 | <b>FBXO28</b> | F-box protein 28<br>[Source:HGNC Symbol;Acc:HGNC:29046]                                                   | 0.04 | 5.30 | 3.91E-01 | ENSG00000131023 | <b>LATS1</b> | large tumor suppressor kinase 1<br>[Source:HGNC Symbol;Acc:HGNC:6514]                                          | -0.07 | 5.87 | 3.88E-02 |
| ENSG00000182568 | <b>SATB1</b>  | SATB homeobox 1<br>[Source:HGNC                                                                           | 0.09 | 7.64 | 4.06E-01 | ENSG00000144909 | OSBPL11      | oxysterol binding protein like                                                                                 | -0.17 | 4.79 | 4.23E-02 |

|                 |                |                                                                                                    |      |       |          |                 |       |                                                                                                                         |      |      |          |
|-----------------|----------------|----------------------------------------------------------------------------------------------------|------|-------|----------|-----------------|-------|-------------------------------------------------------------------------------------------------------------------------|------|------|----------|
| ENSG00000119866 | <b>BCL11A</b>  | C<br>Symbol;Acc:<br>HGNC:10541<br>]                                                                | -    | -0.92 | 4.47E-01 | ENSG00000066933 | MYO9A | 11<br>[Source:HG<br>NC<br>Symbol;Acc:<br>HGNC:1639<br>7]<br>myosin IXA<br>[Source:HG<br>NC<br>Symbol;Acc:<br>HGNC:7608] | -    | 4.35 | 4.30E-02 |
| ENSG00000173281 | <b>PPP1R3B</b> | B-cell<br>CLL/lymphoma 11A<br>[Source:HGNC<br>C<br>Symbol;Acc:<br>HGNC:13221<br>]                  | 0.35 |       |          | ENSG00000118971 | CCND2 | cyclin D2<br>[Source:HG<br>NC<br>Symbol;Acc:<br>HGNC:1583]                                                              | 0.13 | 7.23 | 4.31E-02 |
| ENSG00000171940 | <b>ZNF217</b>  | protein phosphatase 1 regulatory subunit 3B<br>[Source:HGNC<br>C<br>Symbol;Acc:<br>HGNC:14942<br>] | 0.09 | 3.82  | 4.58E-01 | ENSG00000169564 | PCBP1 | poly(rC) binding protein 1<br>[Source:HG<br>NC<br>Symbol;Acc:<br>HGNC:8647]                                             | -    | 9.08 | 4.32E-02 |
| ENSG00000157933 | <b>SKI</b>     | zinc finger protein 217<br>[Source:HGNC<br>C<br>Symbol;Acc:<br>HGNC:13009<br>]                     | 0.03 | 6.68  | 5.29E-01 | ENSG00000167548 | KMT2D | lysine methyltransferase 2D                                                                                             | -    | 6.96 | 4.38E-02 |
|                 |                | SKI proto-oncogene<br>[Source:HGNC                                                                 | 0.05 | 7.14  | 5.44E-01 |                 |       |                                                                                                                         | 0.08 |      |          |

|                 |               |                                                                                                                      |           |      |          |  |  |  |  |
|-----------------|---------------|----------------------------------------------------------------------------------------------------------------------|-----------|------|----------|--|--|--|--|
| ENSG00000143878 | <b>RHOB</b>   | C<br>Symbol;Acc:<br>HGNC:10896<br>]<br>ras homolog<br>family<br>member B<br>[Source:HGNC<br>Symbol;Acc:<br>HGNC:668] | -<br>0.19 | 5.49 | 5.62E-01 |  |  |  |  |
| ENSG00000102908 | <b>NFAT5</b>  | nuclear<br>factor of<br>activated T-<br>cells 5<br>[Source:HGNC<br>Symbol;Acc:<br>HGNC:7774]                         | -<br>0.03 | 5.84 | 5.65E-01 |  |  |  |  |
| ENSG00000163939 | <b>PBRM1</b>  | polybromo 1<br>[Source:HGNC<br>Symbol;Acc:<br>HGNC:30064<br>]                                                        | -<br>0.02 | 5.89 | 5.65E-01 |  |  |  |  |
| ENSG00000165572 | <b>KBTBD6</b> | kelch repeat<br>and BTB<br>domain<br>containing 6                                                                    | -<br>0.05 | 2.93 | 5.77E-01 |  |  |  |  |
| ENSG00000125538 | <b>IL1B</b>   | [Source:HGNC<br>Symbol;Acc:<br>HGNC:7133]<br>interleukin<br>1 beta<br>[Source:HGNC<br>Symbol;Acc:<br>HGNC:5992]      | -<br>1.38 | 0.88 | 4.39E-02 |  |  |  |  |
| ENSG00000129128 | <b>SPCS3</b>  | signal<br>peptidase<br>complex<br>subunit 3<br>[Source:HGNC<br>Symbol;Acc:<br>HGNC:2621<br>2]                        | 0.10      | 7.47 | 4.41E-02 |  |  |  |  |
| ENSG00000124209 | <b>RAB22A</b> | RAB22A,<br>member<br>RAS<br>oncogene<br>family<br>[Source:HGNC<br>Symbol;Acc:<br>HGNC:9764]                          | 0.11      | 4.57 | 4.50E-02 |  |  |  |  |
| ENSG00000138336 | <b>TET1</b>   | tet<br>methylcytosine<br>dioxygenase                                                                                 | -<br>0.26 | 1.57 | 4.81E-02 |  |  |  |  |

|                     |                |                                                                                                                                                                      |      |      |              |                 |        |                                                                                                                                                                  |           |       |              |
|---------------------|----------------|----------------------------------------------------------------------------------------------------------------------------------------------------------------------|------|------|--------------|-----------------|--------|------------------------------------------------------------------------------------------------------------------------------------------------------------------|-----------|-------|--------------|
| ENSG0000015574<br>4 | <b>FAM126B</b> | [Source:HGN<br>C<br>Symbol;Acc:<br>HGNC:25340<br>]<br>family with<br>sequence<br>similarity<br>126 member<br>B<br>[Source:HGN<br>C<br>Symbol;Acc:<br>HGNC:28593<br>] | 0.03 | 4.63 | 6.01E-<br>01 | ENSG00000153187 | HNRNPU | 1<br>[Source:HG<br>NC<br>Symbol;Acc:<br>HGNC:2948<br>4]<br>heterogene<br>ous nuclear<br>ribonucleop<br>rotein U<br>[Source:HG<br>NC<br>Symbol;Acc:<br>HGNC:5048] | -<br>0.10 | 8.12  | 4.94E-<br>02 |
| ENSG0000019693<br>7 | <b>FAM3C</b>   | family with<br>sequence<br>similarity 3<br>member C<br>[Source:HGN<br>C<br>Symbol;Acc:<br>HGNC:18664<br>]                                                            | 0.04 | 4.85 | 6.18E-<br>01 | ENSG00000185246 | PRPF39 | pre-mRNA<br>processing<br>factor 39<br>[Source:HG<br>NC<br>Symbol;Acc:<br>HGNC:2031<br>4]                                                                        | -<br>0.08 | 6.85  | 5.31E-<br>02 |
| ENSG0000012312<br>4 | <b>WWP1</b>    | WW domain<br>containing<br>E3 ubiquitin<br>protein<br>ligase 1<br>[Source:HGN<br>C<br>Symbol;Acc:                                                                    | 0.03 | 6.97 | 6.71E-<br>01 | ENSG00000109458 | GAB1   | GRB2<br>associated<br>binding<br>protein 1<br>[Source:HG<br>NC<br>Symbol;Acc:<br>HGNC:4066]                                                                      | -<br>0.83 | -1.43 | 5.55E-<br>02 |

|                 |               |                                                                                                   |      |      |          |                 |         |                                                                               |      |      |          |
|-----------------|---------------|---------------------------------------------------------------------------------------------------|------|------|----------|-----------------|---------|-------------------------------------------------------------------------------|------|------|----------|
| ENSG00000101972 | <b>STAG2</b>  | <p>HGNC:17004]</p> <p>stromal antigen 2</p> <p>[Source:HGNC Symbol;Acc:HGNC:11355]</p>            | 0.01 | 6.93 | 6.78E-01 | ENSG00000112159 | MDN1    | <p>midasin</p> <p>AAA ATPase 1</p> <p>[Source:HGNC Symbol;Acc:HGNC:18302]</p> | -    | 6.59 | 5.75E-02 |
| ENSG00000204116 | CHIC1         | <p>cysteine rich hydrophobic domain 1</p> <p>[Source:HGNC Symbol;Acc:HGNC:1934]</p>               | 0.02 | 5.46 | 6.97E-01 | ENSG00000135046 | ANXA1   | <p>annexin A1</p> <p>[Source:HGNC Symbol;Acc:HGNC:533]</p>                    | -    | 8.85 | 5.78E-02 |
| ENSG00000095015 | <b>MAP3K1</b> | <p>mitogen-activated protein kinase kinase kinase 1</p> <p>[Source:HGNC Symbol;Acc:HGNC:6848]</p> | 0.03 | 8.20 | 7.24E-01 | ENSG00000031691 | CENPQ   | <p>centromere protein Q</p> <p>[Source:HGNC Symbol;Acc:HGNC:21347]</p>        | -    | 3.52 | 6.30E-02 |
| ENSG00000112739 | PRPF4B        | <p>pre-mRNA processing factor 4B</p> <p>[Source:HGNC Symbol;Acc:</p>                              | -    | 7.52 | 7.66E-01 | ENSG00000196227 | FAM217B | <p>family with sequence similarity 217 member B</p> <p>[Source:HG</p>         | 0.12 | 5.04 | 6.53E-02 |

|                     |               |                                                                                                                                                               |           |      |              |  |  |  |  |  |
|---------------------|---------------|---------------------------------------------------------------------------------------------------------------------------------------------------------------|-----------|------|--------------|--|--|--|--|--|
| ENSG0000015774<br>1 | UBN2          | ubineuclein 2<br>[Source:HGNC<br>Symbol;Acc:<br>HGNC:21931<br>]                                                                                               | -<br>0.02 | 5.00 | 7.75E-<br>01 |  |  |  |  |  |
| ENSG0000011330<br>0 | <b>CNOT6</b>  | CCR4-NOT<br>transcription<br>complex<br>subunit 6<br>[Source:HGNC<br>Symbol;Acc:<br>HGNC:14099<br>]                                                           | 0.02      | 5.64 | 7.85E-<br>01 |  |  |  |  |  |
| ENSG0000012892<br>3 | <b>FAM63B</b> | family with<br>sequence<br>similarity 63<br>member B<br>[Source:HGNC                                                                                          | 0.02      | 4.99 | 8.39E-<br>01 |  |  |  |  |  |
| ENSG00000154518     | ATP5G3        | ATP<br>synthase,<br>H+<br>transporting<br>,<br>mitochondri<br>al Fo<br>complex<br>subunit C3<br>(subunit 9)<br>[Source:HGNC<br>Symbol;Acc:<br>HGNC:1617<br>0] | 0.10      | 4.69 | 6.92E-<br>02 |  |  |  |  |  |
| ENSG00000048649     | RSF1          | remodeling<br>and spacing<br>factor 1<br>[Source:HGNC<br>Symbol;Acc:<br>HGNC:843]                                                                             | 0.07      | 5.37 | 6.93E-<br>02 |  |  |  |  |  |
| ENSG00000076641     | <b>PAG1</b>   | phosphopro<br>tein<br>membrane<br>anchor with<br>glycosphing<br>olipid                                                                                        | 0.18      | 8.28 | 7.03E-<br>02 |  |  |  |  |  |

|                 |               |                                                                                   |      |      |          |                 |               |                                                                                                                                                        |      |      |          |  |
|-----------------|---------------|-----------------------------------------------------------------------------------|------|------|----------|-----------------|---------------|--------------------------------------------------------------------------------------------------------------------------------------------------------|------|------|----------|--|
|                 |               | Symbol;Acc:<br>HGNC:26954<br>]                                                    |      |      |          |                 |               |                                                                                                                                                        |      |      |          |  |
| ENSG00000105810 | CDK6          | cyclin dependent kinase 6<br>[Source:HGNC<br>Symbol;Acc:<br>HGNC:1777]            | 0.02 | 5.82 | 8.84E-01 | ENSG00000169967 | MAP3K2        | microdomains 1<br>[Source:HGNC<br>Symbol;Acc:<br>HGNC:30043]<br>mitogen-activated protein kinase kinase 2<br>[Source:HGNC<br>Symbol;Acc:<br>HGNC:6854] | 0.06 | 6.44 | 7.07E-02 |  |
| ENSG00000138081 | <b>FBXO11</b> | F-box protein 11<br>[Source:HGNC<br>Symbol;Acc:<br>HGNC:13590<br>]                | 0.00 | 6.64 | 8.93E-01 | ENSG00000165244 | <b>ZNF367</b> | zinc finger protein 367<br>[Source:HGNC<br>Symbol;Acc:<br>HGNC:18320]                                                                                  | 0.16 | 3.85 | 7.29E-02 |  |
| ENSG00000178177 | LCORL         | ligand dependent nuclear receptor corepressor like<br>[Source:HGNC<br>Symbol;Acc: | 0.01 | 2.93 | 9.10E-01 | ENSG00000140299 | BNIP2         | BCL2 interacting protein 2<br>[Source:HGNC<br>Symbol;Acc:<br>HGNC:1083]                                                                                | 0.07 | 6.14 | 7.31E-02 |  |



|                 |          |                                                                                                                    |      |      |          |                 |         |                                                                                   |       |      |          |
|-----------------|----------|--------------------------------------------------------------------------------------------------------------------|------|------|----------|-----------------|---------|-----------------------------------------------------------------------------------|-------|------|----------|
| ENSG00000148730 | EIF4EBP2 | HGNC:30776<br>] eukaryotic translation initiation factor 4E binding protein 2 [Source:HGN C Symbol;Acc: HGNC:3289] | 0.00 | 7.12 | 9.40E-01 | ENSG00000143614 | GATAD2B | GATA zinc finger domain containing 2B [Source:HGN C Symbol;Acc: HGNC:30778]       | 0.06  | 6.47 | 7.94E-02 |
| ENSG00000103064 | SLC7A6   | solute carrier family 7 member 6 [Source:HGN C Symbol;Acc: HGNC:11064]                                             | 0.01 | 8.52 | 9.45E-01 | ENSG00000163624 | CDS1    | CDP-diacylglycerol synthase 1 [Source:HGN C Symbol;Acc: HGNC:1800]                | -0.27 | 0.83 | 8.08E-02 |
| ENSG00000115020 | PIKFYVE  | phosphoinositide kinase, FYVE-type zinc finger containing [Source:HGN C Symbol;Acc: HGNC:23785]                    | 0.00 | 6.42 | 9.73E-01 | ENSG00000183508 | FAM46C  | family with sequence similarity 46 member C [Source:HGN C Symbol;Acc: HGNC:24712] | -0.44 | 6.75 | 8.49E-02 |
| ENSG00000145675 | PIK3R1   | phosphoinositide-3-                                                                                                | 0.00 | 7.40 | 9.80E-01 | ENSG00000008277 | ADAM22  | ADAM metallopt                                                                    | -0.23 | 1.73 | 8.58E-02 |

|                |                |                                                                                                   |      |      |          |
|----------------|----------------|---------------------------------------------------------------------------------------------------|------|------|----------|
| ENSG0000012347 | ATPAF1         | kinase regulatory subunit 1<br>[Source:HGNC<br>Symbol;Acc:HGNC:8979]                              | 0.00 | 5.17 | 9.89E-01 |
| ENSG0000017257 | <b>RASGRP1</b> | ATP synthase mitochondrial F1 complex assembly factor 1<br>[Source:HGNC<br>Symbol;Acc:HGNC:18803] | 0.00 | 8.41 | 9.99E-01 |
|                |                | RAS guanyl releasing protein 1<br>[Source:HGNC<br>Symbol;Acc:HGNC:9878]                           |      |      |          |

|                 |       |                                                                 |       |      |          |
|-----------------|-------|-----------------------------------------------------------------|-------|------|----------|
| ENSG00000196591 | HDAC2 | histone deacetylase 2<br>[Source:HGNC<br>Symbol;Acc:HGNC:4853]  | -0.13 | 4.32 | 8.59E-02 |
| ENSG00000080546 | SESN1 | sestrin 1<br>[Source:HGNC<br>Symbol;Acc:HGNC:21595]             | 0.25  | 6.65 | 8.70E-02 |
| ENSG00000198855 | FICD  | FIC domain containing<br>[Source:HGNC<br>Symbol;Acc:HGNC:18416] | 0.21  | 2.08 | 9.01E-02 |

|                 |             |                                                                                     |           |      |          |
|-----------------|-------------|-------------------------------------------------------------------------------------|-----------|------|----------|
| ENSG00000140575 | IQGAP1      | IQ motif containing GTPase activating protein 1 [Source:HG NC Symbol;Acc:HGNC:6110] | -<br>0.13 | 6.82 | 9.03E-02 |
| ENSG00000104343 | UBE2W       | ubiquitin conjugating enzyme E2 W (putative) [Source:HG NC Symbol;Acc:HGNC:25616]   | 0.08      | 4.35 | 9.23E-02 |
| ENSG00000166225 | <b>FRS2</b> | fibroblast growth factor receptor substrate 2 [Source:HG NC Symbol;Acc:HGNC:16971]  | 0.08      | 4.97 | 9.50E-02 |
| ENSG00000118263 | KLF7        | Kruppel like factor 7 [Source:HG NC                                                 | 0.16      | 6.27 | 9.58E-02 |

|                 |       |                                                                                                                   |           |      |              |
|-----------------|-------|-------------------------------------------------------------------------------------------------------------------|-----------|------|--------------|
| ENSG00000102218 | RP2   | Symbol;Acc:<br>HGNC:6350]<br>retinitis<br>pigmentosa<br>2 (X-linked<br>recessive)<br>[Source:HG<br>NC             | -<br>0.15 | 3.81 | 9.83E-<br>02 |
| ENSG00000168807 | SNTB2 | Symbol;Acc:<br>HGNC:1027<br>4]<br>syntrophin<br>beta 2<br>[Source:HG<br>NC                                        | 0.19      | 4.62 | 1.03E-<br>01 |
| ENSG00000025796 | SEC63 | Symbol;Acc:<br>HGNC:1116<br>9]<br>SEC63<br>homolog,<br>protein<br>translocatio<br>n regulator<br>[Source:HG<br>NC | 0.06      | 5.69 | 1.03E-<br>01 |
| ENSG00000107036 | RIC1  | Symbol;Acc:<br>HGNC:2108<br>2]<br>RIC1<br>homolog,<br>RAB6A GEF<br>complex<br>partner 1                           | 0.07      | 5.43 | 1.04E-<br>01 |

|                 |        |                                                                                                 |           |      |          |
|-----------------|--------|-------------------------------------------------------------------------------------------------|-----------|------|----------|
| ENSG00000120696 | KBTBD7 | [Source:HGNC<br>Symbol;Acc:<br>HGNC:17686]<br>kelch repeat<br>and BTB<br>domain<br>containing 7 | 0.29      | 2.02 | 1.08E-01 |
| ENSG00000164916 | FOXK1  | [Source:HGNC<br>Symbol;Acc:<br>HGNC:25266]<br>forkhead<br>box K1                                | 0.12      | 5.91 | 1.13E-01 |
| ENSG00000136045 | PWP1   | [Source:HGNC<br>Symbol;Acc:<br>HGNC:23480]<br>PWP1<br>homolog,<br>endonuclein                   | -<br>0.07 | 6.17 | 1.14E-01 |
| ENSG00000164039 | BDH2   | [Source:HGNC<br>Symbol;Acc:<br>HGNC:17015]<br>3-<br>hydroxybut<br>yrate<br>dehydrogen           | 0.17      | 4.17 | 1.16E-01 |

|                 |        |                                                                                                                                                      |           |      |              |
|-----------------|--------|------------------------------------------------------------------------------------------------------------------------------------------------------|-----------|------|--------------|
| ENSG00000186687 | LYRM7  | ase, type 2<br>[Source:HG<br>NC<br>Symbol;Acc:<br>HGNC:3238<br>9]<br>LYR motif<br>containing 7<br>[Source:HG<br>NC<br>Symbol;Acc:<br>HGNC:2807<br>2] | -<br>0.10 | 5.42 | 1.17E-<br>01 |
| ENSG00000065613 | SLK    | STE20 like<br>kinase<br>[Source:HG<br>NC<br>Symbol;Acc:<br>HGNC:1108<br>8]                                                                           | -<br>0.08 | 6.04 | 1.24E-<br>01 |
| ENSG00000019995 | ZRANB1 | zinc finger<br>RANBP2-<br>type<br>containing 1<br>[Source:HG<br>NC<br>Symbol;Acc:<br>HGNC:1822<br>4]                                                 | 0.06      | 5.57 | 1.25E-<br>01 |
| ENSG00000156735 | BAG4   | BCL2<br>associated<br>athanogene<br>4                                                                                                                | 0.11      | 4.01 | 1.27E-<br>01 |

|                 |        |                                                                                                                                        |           |      |              |
|-----------------|--------|----------------------------------------------------------------------------------------------------------------------------------------|-----------|------|--------------|
| ENSG00000157106 | SMG1   | [Source:HG<br>NC<br>Symbol;Acc:<br>HGNC:940]<br>SMG1,<br>nonsense<br>mediated<br>mRNA<br>decay<br>associated<br>PI3K related<br>kinase | -<br>0.08 | 7.37 | 1.36E-<br>01 |
| ENSG00000197147 | LRRC8B | [Source:HG<br>NC<br>Symbol;Acc:<br>HGNC:3004<br>5]<br>leucine rich<br>repeat<br>containing 8<br>family<br>member B                     | 0.14      | 4.83 | 1.36E-<br>01 |
| ENSG00000090104 | RGS1   | [Source:HG<br>NC<br>Symbol;Acc:<br>HGNC:3069<br>2]<br>regulator of<br>G-protein<br>signaling 1<br>[Source:HG<br>NC<br>Symbol;Acc:      | -<br>0.45 | 8.05 | 1.37E-<br>01 |

|                 |          |                                                                                                                              |           |      |              |
|-----------------|----------|------------------------------------------------------------------------------------------------------------------------------|-----------|------|--------------|
| ENSG00000165219 | GAPVD1   | HGNC:9991]<br>GTPase<br>activating<br>protein and<br>VPS9<br>domains 1<br>[Source:HG<br>NC<br>Symbol;Acc:<br>HGNC:2337<br>5] | 0.07      | 5.09 | 1.37E-<br>01 |
| ENSG00000164237 | CMBL     | carboxymet<br>hylenebut<br>nolidase<br>homolog<br>[Source:HG<br>NC<br>Symbol;Acc:<br>HGNC:2509<br>0]                         | -<br>0.37 | 0.54 | 1.40E-<br>01 |
| ENSG00000198743 | SLC5A3   | solute<br>carrier<br>family 5<br>member 3<br>[Source:HG<br>NC<br>Symbol;Acc:<br>HGNC:1103<br>8]                              | -<br>0.16 | 5.06 | 1.40E-<br>01 |
| ENSG00000174718 | KIAA1551 | KIAA1551<br>[Source:HG<br>NC<br>Symbol;Acc:                                                                                  | -<br>0.13 | 8.85 | 1.40E-<br>01 |



|                 |          |                                                                                                                 |           |      |              |
|-----------------|----------|-----------------------------------------------------------------------------------------------------------------|-----------|------|--------------|
| ENSG00000120868 | APAF1    | HGNC:25559]<br>apoptotic<br>peptidase<br>activating<br>factor 1<br>[Source:HG<br>NC<br>Symbol;Acc:<br>HGNC:576] | -<br>0.08 | 5.15 | 1.43E-<br>01 |
| ENSG00000101856 | PGRMC1   | progesteron<br>e receptor<br>membrane<br>component<br>1<br>[Source:HG<br>NC<br>Symbol;Acc:<br>HGNC:1609<br>0]   | 0.08      | 5.17 | 1.45E-<br>01 |
| ENSG00000155640 | -        | -                                                                                                               | 0.16      | 4.26 | 1.46E-<br>01 |
| ENSG00000151553 | FAM160B1 | family with<br>sequence<br>similarity<br>160<br>member B1<br>[Source:HG<br>NC<br>Symbol;Acc:<br>HGNC:2932<br>0] | 0.18      | 5.76 | 1.46E-<br>01 |
| ENSG00000174010 | KLHL15   | kelch like                                                                                                      | 0.12      | 4.55 | 1.48E-       |

|                 |       |                                                                                                                |           |      |          |
|-----------------|-------|----------------------------------------------------------------------------------------------------------------|-----------|------|----------|
|                 |       | family member 15<br>[Source:HGNC<br>Symbol;Acc:<br>HGNC:29347]                                                 |           |      | 01       |
| ENSG00000153250 | RBMS1 | RNA binding motif single stranded interacting protein 1<br>[Source:HGNC<br>Symbol;Acc:<br>HGNC:9907]           | 0.10      | 6.79 | 1.48E-01 |
| ENSG00000145604 | SKP2  | S-phase kinase-associated protein 2, E3 ubiquitin protein ligase<br>[Source:HGNC<br>Symbol;Acc:<br>HGNC:10901] | -<br>0.12 | 4.79 | 1.55E-01 |
| ENSG00000111300 | NAA25 | N(alpha)-acetyltransferase 25, NatB auxiliary                                                                  | 0.08      | 5.08 | 1.58E-01 |

|                 |             |                                                                                                                    |           |      |              |
|-----------------|-------------|--------------------------------------------------------------------------------------------------------------------|-----------|------|--------------|
| ENSG00000100422 | CERK        | subunit<br>[Source:HG<br>NC<br>Symbol;Acc:<br>HGNC:2578<br>3]<br>ceramide<br>kinase                                | 0.09      | 7.87 | 1.59E-<br>01 |
| ENSG00000134698 | <b>AGO4</b> | [Source:HG<br>NC<br>Symbol;Acc:<br>HGNC:1925<br>6]<br>argonaute<br>4, RISC<br>catalytic<br>component               | 0.17      | 5.75 | 1.65E-<br>01 |
| ENSG00000164252 | AGGF1       | [Source:HG<br>NC<br>Symbol;Acc:<br>HGNC:1842<br>4]<br>angiogenic<br>factor with<br>G-patch and<br>FHA<br>domains 1 | -<br>0.06 | 5.64 | 1.65E-<br>01 |
| ENSG00000079785 | DDX1        | [Source:HG<br>NC<br>Symbol;Acc:<br>HGNC:2468<br>4]<br>DEAD/H-                                                      | -         | 6.10 | 1.66E-       |

|                 |          |                                                                                                                        |           |      |              |
|-----------------|----------|------------------------------------------------------------------------------------------------------------------------|-----------|------|--------------|
|                 |          | box helicase<br>1<br>[Source:HG<br>NC<br>Symbol;Acc:<br>HGNC:2734]                                                     | 0.06      |      | 01           |
| ENSG00000135318 | NT5E     | 5'-<br>nucleotidas<br>e ecto<br>[Source:HG<br>NC<br>Symbol;Acc:<br>HGNC:8021]                                          | -<br>0.43 | 2.73 | 1.71E-<br>01 |
| ENSG00000116106 | EPHA4    | EPH<br>receptor A4<br>[Source:HG<br>NC<br>Symbol;Acc:<br>HGNC:3388]                                                    | 0.24      | 5.25 | 1.74E-<br>01 |
| ENSG00000125430 | HS3ST3B1 | heparan<br>sulfate-<br>glucosamin<br>e 3-<br>sulfotransfe<br>rase 3B1<br>[Source:HG<br>NC<br>Symbol;Acc:<br>HGNC:5198] | 0.11      | 5.43 | 1.76E-<br>01 |
| ENSG00000119138 | KLF9     | Kruppel like<br>factor 9<br>[Source:HG<br>NC                                                                           | 0.18      | 7.60 | 1.81E-<br>01 |

|                 |       |                                                                                                                           |           |      |              |
|-----------------|-------|---------------------------------------------------------------------------------------------------------------------------|-----------|------|--------------|
| ENSG00000165929 | TC2N  | Symbol;Acc:<br>HGNC:1123]<br>tandem C2<br>domains,<br>nuclear<br>[Source:HG<br>NC<br>Symbol;Acc:<br>HGNC:1985<br>9]       | -<br>0.11 | 8.46 | 1.82E-<br>01 |
| ENSG00000110422 | HIPK3 | homeodom<br>ain<br>interacting<br>protein<br>kinase 3<br>[Source:HG<br>NC<br>Symbol;Acc:<br>HGNC:4915]                    | -<br>0.08 | 6.58 | 1.84E-<br>01 |
| ENSG00000118762 | PKD2  | polycystin 2,<br>transient<br>receptor<br>potential<br>cation<br>channel<br>[Source:HG<br>NC<br>Symbol;Acc:<br>HGNC:9009] | 0.18      | 4.94 | 1.86E-<br>01 |
| ENSG00000182504 | CEP97 | centrosomal<br>protein 97<br>[Source:HG<br>NC                                                                             | 0.07      | 4.48 | 1.90E-<br>01 |

|                 |               |                                                                                                                                 |           |      |              |
|-----------------|---------------|---------------------------------------------------------------------------------------------------------------------------------|-----------|------|--------------|
| ENSG00000084093 | REST          | Symbol;Acc:<br>HGNC:2624<br>4]<br>RE1<br>silencing<br>transcriptio<br>n factor<br>[Source:HG<br>NC<br>Symbol;Acc:<br>HGNC:9966] | 0.05      | 6.04 | 1.92E-<br>01 |
| ENSG00000156531 | PHF6          | PHD finger<br>protein 6<br>[Source:HG<br>NC<br>Symbol;Acc:<br>HGNC:1814<br>5]                                                   | -<br>0.07 | 4.94 | 1.93E-<br>01 |
| ENSG00000132912 | DCTN4         | dynactin<br>subunit 4<br>[Source:HG<br>NC<br>Symbol;Acc:<br>HGNC:1551<br>8]                                                     | 0.06      | 5.33 | 1.95E-<br>01 |
| ENSG00000197323 | <b>TRIM33</b> | tripartite<br>motif<br>containing<br>33<br>[Source:HG<br>NC<br>Symbol;Acc:<br>HGNC:1629                                         | 0.04      | 6.56 | 1.95E-<br>01 |

|                 |        |                                                                                                    |           |      |              |
|-----------------|--------|----------------------------------------------------------------------------------------------------|-----------|------|--------------|
| ENSG00000052795 | FNIP2  | 0]<br>folliculin<br>interacting<br>protein 2<br>[Source:HG<br>NC<br>Symbol;Acc:<br>HGNC:2928<br>0] | -<br>0.07 | 3.32 | 1.97E-<br>01 |
| ENSG00000211455 | STK38L | serine/thre<br>onine<br>kinase 38<br>like<br>[Source:HG<br>NC<br>Symbol;Acc:<br>HGNC:1784<br>8]    | -<br>0.06 | 4.69 | 1.99E-<br>01 |
| ENSG00000101665 | SMAD7  | SMAD<br>family<br>member 7<br>[Source:HG<br>NC<br>Symbol;Acc:<br>HGNC:6773]                        | -<br>0.28 | 4.63 | 2.08E-<br>01 |
| ENSG00000103769 | RAB11A | RAB11A,<br>member<br>RAS<br>oncogene<br>family<br>[Source:HG<br>NC<br>Symbol;Acc:                  | -<br>0.05 | 5.76 | 2.12E-<br>01 |

|                 |       |                                                                                                            |           |      |              |
|-----------------|-------|------------------------------------------------------------------------------------------------------------|-----------|------|--------------|
| ENSG00000141034 | GID4  | HGNC:9760]<br>GID<br>complex<br>subunit 4<br>homolog<br>[Source:HG<br>NC<br>Symbol;Acc:<br>HGNC:2845<br>3] | -<br>0.14 | 4.12 | 2.13E-<br>01 |
| ENSG00000172915 | NBEA  | neurobeach<br>in<br>[Source:HG<br>NC<br>Symbol;Acc:<br>HGNC:7648]                                          | 0.23      | 2.11 | 2.16E-<br>01 |
| ENSG00000106780 | MEGF9 | multiple<br>EGF like<br>domains 9<br>[Source:HG<br>NC<br>Symbol;Acc:<br>HGNC:3234]                         | 0.11      | 5.54 | 2.18E-<br>01 |
| ENSG00000156052 | GNAQ  | G protein<br>subunit<br>alpha q<br>[Source:HG<br>NC<br>Symbol;Acc:<br>HGNC:4390]                           | 0.05      | 6.60 | 2.18E-<br>01 |
| ENSG00000095139 | ARCN1 | archain 1<br>[Source:HG<br>NC                                                                              | -<br>0.08 | 7.02 | 2.20E-<br>01 |



|                 |        |                                                                                                                                                 |           |      |              |
|-----------------|--------|-------------------------------------------------------------------------------------------------------------------------------------------------|-----------|------|--------------|
| ENSG00000145916 | RMND5B | Symbol;Acc:<br>HGNC:649]<br>required for<br>meiotic<br>nuclear<br>division 5<br>homolog B<br>[Source:HG<br>NC<br>Symbol;Acc:<br>HGNC:2618<br>1] | -<br>0.06 | 4.33 | 2.22E-<br>01 |
| ENSG00000106692 | FKTN   | fukutin<br>[Source:HG<br>NC<br>Symbol;Acc:<br>HGNC:3622]                                                                                        | 0.08      | 5.14 | 2.26E-<br>01 |
| ENSG00000188647 | PTAR1  | protein<br>prenyltransf<br>erase alpha<br>subunit<br>repeat<br>containing 1<br>[Source:HG<br>NC<br>Symbol;Acc:<br>HGNC:3044<br>9]               | 0.05      | 6.78 | 2.32E-<br>01 |
| ENSG00000101126 | ADNP   | activity<br>dependent<br>neuroprotec<br>tor<br>homeobox                                                                                         | 0.05      | 6.66 | 2.35E-<br>01 |

|                 |        |                                                                                                                   |           |      |          |
|-----------------|--------|-------------------------------------------------------------------------------------------------------------------|-----------|------|----------|
| ENSG00000165102 | HGSNAT | [Source:HGNC<br>Symbol;Acc:<br>HGNC:15766]<br>heparan-<br>alpha-<br>glucosami-<br>de N-<br>acetyltransf-<br>erase | 0.07      | 5.52 | 2.38E-01 |
| ENSG00000197111 | PCBP2  | [Source:HGNC<br>Symbol;Acc:<br>HGNC:26527]<br>poly(rC)<br>binding<br>protein 2                                    | 0.05      | 6.83 | 2.43E-01 |
| ENSG00000136986 | DERL1  | [Source:HGNC<br>Symbol;Acc:<br>HGNC:8648]<br>derlin 1                                                             | -<br>0.07 | 5.60 | 2.47E-01 |
| ENSG00000101367 | MAPRE1 | [Source:HGNC<br>Symbol;Acc:<br>HGNC:28454]<br>microtubule<br>associated<br>protein<br>RP/EB                       | -<br>0.05 | 7.41 | 2.50E-01 |

|                 |        |                                                                                                                                             |       |       |          |
|-----------------|--------|---------------------------------------------------------------------------------------------------------------------------------------------|-------|-------|----------|
| ENSG00000183808 | RBM12B | family member 1<br>[Source:HGNC<br>Symbol;Acc:<br>HGNC:6890]<br>RNA binding motif protein 12B<br>[Source:HGNC<br>Symbol;Acc:<br>HGNC:32310] | -0.08 | 4.97  | 2.53E-01 |
| ENSG00000138430 | OLA1   | Obg-like ATPase 1<br>[Source:HGNC<br>Symbol;Acc:<br>HGNC:28833]                                                                             | 0.06  | 5.00  | 2.54E-01 |
| ENSG00000136381 | IREB2  | iron responsive element binding protein 2<br>[Source:HGNC<br>Symbol;Acc:<br>HGNC:6115]                                                      | 0.05  | 5.96  | 2.57E-01 |
| ENSG00000115183 | TANC1  | tetratricopeptide repeat,                                                                                                                   | 0.29  | -0.39 | 2.57E-01 |

|                 |         |                                                                                                                                                     |           |      |          |
|-----------------|---------|-----------------------------------------------------------------------------------------------------------------------------------------------------|-----------|------|----------|
| ENSG00000013503 | POLR3B  | ankyrin repeat and coiled-coil containing 1 [Source:HGNC Symbol;Acc:HGNC:29364]<br>RNA polymerase III subunit B [Source:HGNC Symbol;Acc:HGNC:30348] | -<br>0.10 | 3.60 | 2.61E-01 |
| ENSG00000100030 | MAPK1   | mitogen-activated protein kinase 1 [Source:HGNC Symbol;Acc:HGNC:6871]                                                                               | -<br>0.06 | 6.48 | 2.62E-01 |
| ENSG00000066117 | SMARCD1 | SWI/SNF related, matrix associated, actin dependent regulator of chromatin,                                                                         | 0.04      | 6.43 | 2.66E-01 |

|                 |         |                                                                                                                                                                                    |      |      |              |
|-----------------|---------|------------------------------------------------------------------------------------------------------------------------------------------------------------------------------------|------|------|--------------|
| ENSG00000155850 | SLC26A2 | subfamily d,<br>member 1<br>[Source:HG<br>NC<br>Symbol;Acc:<br>HGNC:1110<br>6]<br>solute<br>carrier<br>family 26<br>member 2<br>[Source:HG<br>NC<br>Symbol;Acc:<br>HGNC:1099<br>4] | 0.05 | 4.32 | 2.67E-<br>01 |
| ENSG00000129636 | ITFG1   | integrin<br>alpha FG-<br>GAP repeat<br>containing 1<br>[Source:HG<br>NC<br>Symbol;Acc:<br>HGNC:3069<br>7]                                                                          | 0.06 | 3.57 | 2.67E-<br>01 |
| ENSG00000165943 | MOAP1   | modulator<br>of apoptosis<br>1<br>[Source:HG<br>NC<br>Symbol;Acc:<br>HGNC:1665<br>8]                                                                                               | 0.09 | 7.87 | 2.68E-<br>01 |

|                 |                |                                                                                                         |           |      |              |
|-----------------|----------------|---------------------------------------------------------------------------------------------------------|-----------|------|--------------|
| ENSG00000135452 | TSPAN31        | tetraspanin<br>31<br>[Source:HG<br>NC<br>Symbol;Acc:<br>HGNC:1053<br>9]                                 | -<br>0.10 | 4.22 | 2.70E-<br>01 |
| ENSG00000256223 | ZNF10          | zinc finger<br>protein 10<br>[Source:HG<br>NC<br>Symbol;Acc:<br>HGNC:1287<br>9]                         | -<br>0.07 | 4.06 | 2.71E-<br>01 |
| ENSG00000120708 | TGFBI          | transformin<br>g growth<br>factor beta<br>induced<br>[Source:HG<br>NC<br>Symbol;Acc:<br>HGNC:1177<br>1] | -<br>0.33 | 1.53 | 2.73E-<br>01 |
| ENSG00000177189 | <b>RPS6KA3</b> | ribosomal<br>protein S6<br>kinase A3<br>[Source:HG<br>NC<br>Symbol;Acc:<br>HGNC:1043<br>2]              | 0.06      | 7.43 | 2.83E-<br>01 |
| ENSG00000156875 | MFSD14A        | major<br>facilitator                                                                                    | 0.05      | 6.70 | 2.84E-<br>01 |

|                 |          |                                                                                                                                                       |           |      |          |
|-----------------|----------|-------------------------------------------------------------------------------------------------------------------------------------------------------|-----------|------|----------|
| ENSG00000112394 | SLC16A10 | superfamily domain containing 14A<br>[Source:HGNC Symbol;Acc:HGNC:23363]<br>solute carrier family 16 member 10<br>[Source:HGNC Symbol;Acc:HGNC:17027] | 0.16      | 4.08 | 2.86E-01 |
| ENSG00000144959 | NCEH1    | neutral cholesterol ester hydrolase 1<br>[Source:HGNC Symbol;Acc:HGNC:29260]                                                                          | -<br>0.14 | 2.41 | 2.91E-01 |
| ENSG00000177200 | CHD9     | chromodomain helicase DNA binding protein 9<br>[Source:HG                                                                                             | 0.08      | 4.59 | 2.92E-01 |

|                 |         |                                                                                                                              |           |      |          |
|-----------------|---------|------------------------------------------------------------------------------------------------------------------------------|-----------|------|----------|
| ENSG00000177932 | ZNF354C | NC<br>Symbol;Acc:<br>HGNC:2570<br>1]<br>zinc finger<br>protein<br>354C<br>[Source:HG<br>NC<br>Symbol;Acc:<br>HGNC:1673<br>6] | 0.06      | 4.99 | 2.95E-01 |
| ENSG00000134318 | ROCK2   | Rho<br>associated<br>coiled-coil<br>containing<br>protein<br>kinase 2<br>[Source:HG<br>NC<br>Symbol;Acc:<br>HGNC:1025<br>2]  | -<br>0.05 | 4.86 | 2.95E-01 |
| ENSG00000180530 | NRIP1   | nuclear<br>receptor<br>interacting<br>protein 1<br>[Source:HG<br>NC<br>Symbol;Acc:<br>HGNC:8001]                             | 0.08      | 5.14 | 2.97E-01 |
| ENSG00000100916 | BRMS1L  | breast<br>cancer                                                                                                             | -<br>0.07 | 3.53 | 2.98E-01 |



|                 |              |                                                                                                                                                         |      |      |          |
|-----------------|--------------|---------------------------------------------------------------------------------------------------------------------------------------------------------|------|------|----------|
| ENSG00000130396 | AFDN         | metastasis-suppressor 1-like<br>[Source:HGNC Symbol;Acc:HGNC:20512]<br>afadin, adherens junction formation factor<br>[Source:HGNC Symbol;Acc:HGNC:7137] | 0.24 | 3.44 | 2.99E-01 |
| ENSG00000181690 | <b>PLAG1</b> | PLAG1 zinc finger<br>[Source:HGNC Symbol;Acc:HGNC:9045]                                                                                                 | 0.14 | 4.53 | 2.99E-01 |
| ENSG00000170860 | LSM3         | LSM3 homolog, U6 small nuclear RNA and mRNA degradation associated<br>[Source:HGNC Symbol;Acc:                                                          | 0.07 | 5.10 | 3.00E-01 |

|                 |               |                                                                                               |           |      |          |
|-----------------|---------------|-----------------------------------------------------------------------------------------------|-----------|------|----------|
| ENSG00000197329 | PEL1          | HGNC:17874]<br>pellino E3 ubiquitin protein ligase 1<br>[Source:HGNC<br>Symbol;Acc:HGNC:8827] | 0.11      | 7.00 | 3.02E-01 |
| ENSG00000101752 | MIB1          | mindbomb E3 ubiquitin protein ligase 1<br>[Source:HGNC<br>Symbol;Acc:HGNC:21086]              | 0.07      | 5.54 | 3.04E-01 |
| ENSG00000162378 | <b>ZYG11B</b> | zyg-11 family member B, cell cycle regulator<br>[Source:HGNC<br>Symbol;Acc:HGNC:25820]        | 0.05      | 5.21 | 3.05E-01 |
| ENSG00000099942 | CRKL          | CRK like proto-oncogene, adaptor                                                              | -<br>0.07 | 6.49 | 3.07E-01 |

|                 |              |                                                                                                                                                     |           |      |              |
|-----------------|--------------|-----------------------------------------------------------------------------------------------------------------------------------------------------|-----------|------|--------------|
| ENSG00000087448 | KLHL42       | protein<br>[Source:HG<br>NC<br>Symbol;Acc:<br>HGNC:2363]<br>kelch like<br>family<br>member 42<br>[Source:HG<br>NC<br>Symbol;Acc:<br>HGNC:2925<br>2] | -<br>0.08 | 5.27 | 3.10E-<br>01 |
| ENSG00000153944 | MSI2         | musashi<br>RNA binding<br>protein 2<br>[Source:HG<br>NC<br>Symbol;Acc:<br>HGNC:1858<br>5]                                                           | 0.05      | 5.89 | 3.17E-<br>01 |
| ENSG00000110047 | EHD1         | EH domain<br>containing 1<br>[Source:HG<br>NC<br>Symbol;Acc:<br>HGNC:3242]                                                                          | -<br>0.07 | 6.61 | 3.19E-<br>01 |
| ENSG00000204217 | <b>BMPR2</b> | bone<br>morphogen<br>etic protein<br>receptor<br>type 2<br>[Source:HG                                                                               | 0.06      | 4.33 | 3.20E-<br>01 |

|                 |        |                                                                                                                                   |      |      |          |
|-----------------|--------|-----------------------------------------------------------------------------------------------------------------------------------|------|------|----------|
| ENSG00000154114 | TBCEL  | NC<br>Symbol;Acc:<br>HGNC:1078]<br>tubulin<br>folding<br>cofactor E<br>like<br>[Source:HG<br>NC<br>Symbol;Acc:<br>HGNC:2811<br>5] | 0.07 | 4.51 | 3.23E-01 |
| ENSG00000086200 | IPO11  | importin 11<br>[Source:HG<br>NC<br>Symbol;Acc:<br>HGNC:2062<br>8]                                                                 | 0.05 | 3.32 | 3.26E-01 |
| ENSG00000074603 | DPP8   | dipeptidyl<br>peptidase 8<br>[Source:HG<br>NC<br>Symbol;Acc:<br>HGNC:1649<br>0]                                                   | 0.03 | 5.74 | 3.29E-01 |
| ENSG00000106415 | GLCCI1 | glucocortico<br>id induced 1<br>[Source:HG<br>NC<br>Symbol;Acc:<br>HGNC:1871<br>3]                                                | 0.08 | 5.73 | 3.32E-01 |
| ENSG00000160199 | PKNOX1 | PBX/knotte                                                                                                                        | -    | 3.79 | 3.37E-   |

|                 |       |                                                                                    |           |      |              |
|-----------------|-------|------------------------------------------------------------------------------------|-----------|------|--------------|
|                 |       | d 1                                                                                | 0.05      |      | 01           |
|                 |       | homeobox<br>1                                                                      |           |      |              |
|                 |       | [Source:HG<br>NC<br>Symbol;Acc:<br>HGNC:9022]                                      |           |      |              |
| ENSG00000072501 | SMC1A | structural<br>maintenanc<br>e of<br>chromosom<br>es 1A                             | -<br>0.10 | 6.25 | 3.37E-<br>01 |
|                 |       | [Source:HG<br>NC<br>Symbol;Acc:<br>HGNC:1111<br>1]                                 |           |      |              |
| ENSG00000060339 | CCAR1 | cell division<br>cycle and<br>apoptosis<br>regulator 1                             | 0.04      | 7.30 | 3.45E-<br>01 |
|                 |       | [Source:HG<br>NC<br>Symbol;Acc:<br>HGNC:2423<br>6]                                 |           |      |              |
| ENSG00000157500 | APPL1 | adaptor<br>protein,<br>phosphoty<br>rosine<br>interacting<br>with PH<br>domain and | -<br>0.04 | 5.21 | 3.54E-<br>01 |

|                 |              |                                                                                                                                                                 |           |      |          |
|-----------------|--------------|-----------------------------------------------------------------------------------------------------------------------------------------------------------------|-----------|------|----------|
| ENSG00000171365 | CLCN5        | leucine zipper 1<br>[Source:HGNC<br>NC<br>Symbol;Acc:<br>HGNC:2403<br>5]<br>chloride voltage-gated channel 5<br>[Source:HGNC<br>NC<br>Symbol;Acc:<br>HGNC:2023] | -<br>0.10 | 1.88 | 3.60E-01 |
| ENSG00000143575 | HAX1         | HCLS1 associated protein X-1<br>[Source:HGNC<br>NC<br>Symbol;Acc:<br>HGNC:1691<br>5]                                                                            | -<br>0.06 | 6.87 | 3.63E-01 |
| ENSG00000116954 | RRAGC        | Ras related GTP binding C<br>[Source:HGNC<br>NC<br>Symbol;Acc:<br>HGNC:1990<br>2]                                                                               | -<br>0.07 | 4.65 | 3.65E-01 |
| ENSG00000185009 | <b>AP3M1</b> | adaptor related                                                                                                                                                 | -<br>0.04 | 5.67 | 3.68E-01 |

|                 |              |                                                                                                                                        |           |      |          |
|-----------------|--------------|----------------------------------------------------------------------------------------------------------------------------------------|-----------|------|----------|
| ENSG00000041353 | RAB27B       | protein complex 3 mu 1 subunit [Source:HGNC Symbol;Acc:HGNC:569] RAB27B, member RAS oncogene family [Source:HGNC Symbol;Acc:HGNC:9767] | 0.17      | 2.88 | 3.69E-01 |
| ENSG00000107864 | <b>CPEB3</b> | cytoplasmic polyadenylation element binding protein 3 [Source:HGNC Symbol;Acc:HGNC:21746]                                              | 0.07      | 2.84 | 3.74E-01 |
| ENSG00000075239 | ACAT1        | acetyl-CoA acetyltransferase 1 [Source:HGNC                                                                                            | -<br>0.08 | 3.93 | 3.75E-01 |

|                 |       |                                                                                                      |           |      |              |
|-----------------|-------|------------------------------------------------------------------------------------------------------|-----------|------|--------------|
| ENSG00000068305 | MEF2A | Symbol;Acc:<br>HGNC:93]<br>myocyte<br>enhancer<br>factor 2A<br>[Source:HG<br>NC                      | 0.06      | 5.71 | 3.79E-<br>01 |
| ENSG00000186432 | KPNA4 | Symbol;Acc:<br>HGNC:6993]<br>karyopherin<br>subunit<br>alpha 4<br>[Source:HG<br>NC                   | -<br>0.04 | 5.45 | 3.82E-<br>01 |
| ENSG00000163069 | SGCB  | Symbol;Acc:<br>HGNC:6397]<br>sarcoglycan<br>beta<br>[Source:HG<br>NC                                 | -<br>0.08 | 3.39 | 3.83E-<br>01 |
| ENSG00000154305 | MIA3  | Symbol;Acc:<br>HGNC:1080<br>6]<br>MIA family<br>member 3,<br>ER export<br>factor<br>[Source:HG<br>NC | -<br>0.04 | 5.87 | 3.85E-<br>01 |
| ENSG00000087470 | DNM1L | Symbol;Acc:<br>HGNC:2400<br>8]<br>dynamin 1                                                          | 0.03      | 5.96 | 3.90E-       |



|                 |              |                                                                                                                                                                                     |       |       |          |
|-----------------|--------------|-------------------------------------------------------------------------------------------------------------------------------------------------------------------------------------|-------|-------|----------|
| ENSG00000150593 | <b>PDCD4</b> | like<br>[Source:HG<br>NC<br>Symbol;Acc:<br>HGNC:2973]<br>programmed cell death<br>4<br>(neoplastic<br>transformation<br>inhibitor)<br>[Source:HG<br>NC<br>Symbol;Acc:<br>HGNC:8763] | 0.05  | 8.46  | 3.90E-01 |
| ENSG00000152642 | GPD1L        | glycerol-3-phosphate<br>dehydrogenase 1-like<br>[Source:HG<br>NC<br>Symbol;Acc:<br>HGNC:28956]                                                                                      | -0.07 | 5.84  | 3.95E-01 |
| ENSG00000170500 | LONRF2       | LON<br>peptidase N-terminal<br>domain and ring finger 2<br>[Source:HG<br>NC<br>Symbol;Acc:                                                                                          | -0.28 | -0.67 | 3.97E-01 |

|                 |        |                                                                                                            |           |       |              |
|-----------------|--------|------------------------------------------------------------------------------------------------------------|-----------|-------|--------------|
| ENSG00000141367 | CLTC   | HGNC:2478<br>8]<br>clathrin<br>heavy chain<br>[Source:HG<br>NC<br>Symbol;Acc:<br>HGNC:2092]                | -<br>0.03 | 5.84  | 3.98E-<br>01 |
| ENSG00000152944 | MED21  | mediator<br>complex<br>subunit 21<br>[Source:HG<br>NC<br>Symbol;Acc:<br>HGNC:1147<br>3]                    | 0.06      | 5.65  | 3.99E-<br>01 |
| ENSG00000020577 | SAMD4A | sterile alpha<br>motif<br>domain<br>containing<br>4A<br>[Source:HG<br>NC<br>Symbol;Acc:<br>HGNC:2302<br>3] | -<br>0.20 | -0.19 | 4.00E-<br>01 |
| ENSG00000138600 | SPPL2A | signal<br>peptide<br>peptidase<br>like 2A<br>[Source:HG<br>NC<br>Symbol;Acc:                               | 0.06      | 5.57  | 4.02E-<br>01 |

|                 |              |                                                                                                                       |           |      |          |
|-----------------|--------------|-----------------------------------------------------------------------------------------------------------------------|-----------|------|----------|
| ENSG00000182568 | <b>SATB1</b> | HGNC:30227]<br>SATB<br>homeobox<br>1<br>[Source:HG<br>NC<br>Symbol;Acc:<br>HGNC:1054<br>1]                            | 0.09      | 7.64 | 4.06E-01 |
| ENSG00000141759 | TXNL4A       | thioredoxin<br>like 4A<br>[Source:HG<br>NC<br>Symbol;Acc:<br>HGNC:3055<br>1]                                          | 0.05      | 5.67 | 4.08E-01 |
| ENSG00000058063 | ATP11B       | ATPase<br>phospholipi<br>d<br>transporting<br>11B<br>(putative)<br>[Source:HG<br>NC<br>Symbol;Acc:<br>HGNC:1355<br>3] | -<br>0.03 | 7.06 | 4.10E-01 |
| ENSG00000127870 | RNF6         | ring finger<br>protein 6<br>[Source:HG<br>NC<br>Symbol;Acc:                                                           | 0.04      | 5.79 | 4.12E-01 |

|                 |          |                                                                                                          |           |      |          |
|-----------------|----------|----------------------------------------------------------------------------------------------------------|-----------|------|----------|
| ENSG00000140525 | FANCI    | HGNC:10069]<br>Fanconi anemia complementation group I<br>[Source:HGNC Symbol;Acc:HGNC:25568]             | -<br>0.07 | 3.36 | 4.16E-01 |
| ENSG00000178691 | SUZ12    | SUZ12 polycomb repressive complex 2 subunit<br>[Source:HGNC Symbol;Acc:HGNC:17101]                       | -<br>0.04 | 6.13 | 4.19E-01 |
| ENSG00000007168 | PAFAH1B1 | platelet activating factor acetylhydrolase 1b regulatory subunit 1<br>[Source:HGNC Symbol;Acc:HGNC:8574] | 0.03      | 7.22 | 4.20E-01 |

|                 |        |                                                                                       |           |      |          |
|-----------------|--------|---------------------------------------------------------------------------------------|-----------|------|----------|
| ENSG00000165650 | PDZD8  | PDZ domain containing 8<br>[Source:HGNC<br>Symbol;Acc:<br>HGNC:26974]                 | -<br>0.08 | 5.11 | 4.24E-01 |
| ENSG00000197969 | VPS13A | vacuolar protein sorting 13 homolog A<br>[Source:HGNC<br>Symbol;Acc:<br>HGNC:1908]    | -<br>0.05 | 6.20 | 4.26E-01 |
| ENSG00000142599 | RERE   | arginine-glutamic acid dipeptide repeats<br>[Source:HGNC<br>Symbol;Acc:<br>HGNC:9965] | 0.05      | 6.56 | 4.32E-01 |
| ENSG00000146281 | PM20D2 | peptidase M20 domain containing 2<br>[Source:HGNC<br>Symbol;Acc:<br>HGNC:21408]       | -<br>0.04 | 5.20 | 4.33E-01 |

|                 |        |                                                                                           |           |      |          |
|-----------------|--------|-------------------------------------------------------------------------------------------|-----------|------|----------|
| ENSG00000058056 | USP13  | ubiquitin specific peptidase 13 (isopeptidase T-3)<br>[Source:HGNC Symbol;Acc:HGNC:12611] | -<br>0.06 | 3.82 | 4.35E-01 |
| ENSG00000163513 | TGFBR2 | transforming growth factor beta receptor 2<br>[Source:HGNC Symbol;Acc:HGNC:11773]         | 0.06      | 8.68 | 4.35E-01 |
| ENSG00000132463 | GRSF1  | G-rich RNA sequence binding factor 1<br>[Source:HGNC Symbol;Acc:HGNC:4610]                | 0.04      | 5.80 | 4.36E-01 |
| ENSG00000118816 | CCNI   | cyclin I<br>[Source:HGNC Symbol;Acc:HGNC:1595]                                            | 0.04      | 9.14 | 4.37E-01 |

|                 |               |                                                                                               |       |       |          |
|-----------------|---------------|-----------------------------------------------------------------------------------------------|-------|-------|----------|
| ENSG00000158604 | TMED4         | transmembrane p24 trafficking protein 4<br>[Source:HGNC Symbol;Acc:HGNC:22301]                | 0.03  | 7.80  | 4.37E-01 |
| ENSG00000180011 | ZADH2         | zinc binding alcohol dehydrogenase domain containing 2<br>[Source:HGNC Symbol;Acc:HGNC:28697] | 0.06  | 5.30  | 4.37E-01 |
| ENSG00000119866 | <b>BCL11A</b> | B-cell CLL/lymphoma 11A<br>[Source:HGNC Symbol;Acc:HGNC:13221]                                | -0.35 | -0.92 | 4.47E-01 |
| ENSG00000196914 | ARHGEF12      | Rho guanine nucleotide exchange factor 12<br>[Source:HGNC                                     | 0.17  | 2.66  | 4.49E-01 |

|                 |                |                                                                                                                |           |      |              |
|-----------------|----------------|----------------------------------------------------------------------------------------------------------------|-----------|------|--------------|
| ENSG00000148158 | SNX30          | Symbol;Acc:<br>HGNC:1419<br>3]<br>sorting<br>nexin family<br>member 30<br>[Source:HG<br>NC                     | -<br>0.06 | 4.81 | 4.50E-<br>01 |
| ENSG00000060749 | QSER1          | Symbol;Acc:<br>HGNC:2368<br>5]<br>glutamine<br>and serine<br>rich 1<br>[Source:HG<br>NC                        | 0.05      | 4.39 | 4.53E-<br>01 |
| ENSG00000173281 | <b>PPP1R3B</b> | Symbol;Acc:<br>HGNC:2615<br>4]<br>protein<br>phosphatas<br>e 1<br>regulatory<br>subunit 3B<br>[Source:HG<br>NC | 0.09      | 3.82 | 4.58E-<br>01 |
| ENSG00000108021 | FAM208B        | Symbol;Acc:<br>HGNC:1494<br>2]<br>family with<br>sequence<br>similarity<br>208                                 | -<br>0.03 | 6.22 | 4.69E-<br>01 |



|                 |       |                                                                                                                                                        |           |      |          |
|-----------------|-------|--------------------------------------------------------------------------------------------------------------------------------------------------------|-----------|------|----------|
| ENSG00000132842 | AP3B1 | member B<br>[Source:HGNC<br>Symbol;Acc:<br>HGNC:23484]<br>adaptor related protein complex 3 beta 1 subunit<br>[Source:HGNC<br>Symbol;Acc:<br>HGNC:566] | -<br>0.04 | 4.91 | 4.71E-01 |
| ENSG00000168610 | STAT3 | signal transducer and activator of transcription 3<br>[Source:HGNC<br>Symbol;Acc:<br>HGNC:11364]                                                       | -<br>0.03 | 6.67 | 4.79E-01 |
| ENSG00000165105 | RASEF | RAS and EF-hand domain containing<br>[Source:HGNC                                                                                                      | -<br>0.21 | 0.50 | 4.80E-01 |

|                 |       |                                                                                                               |           |       |              |
|-----------------|-------|---------------------------------------------------------------------------------------------------------------|-----------|-------|--------------|
| ENSG00000117560 | FASLG | Symbol;Acc:<br>HGNC:2646<br>4]<br>Fas ligand<br>[Source:HG<br>NC                                              | -<br>0.26 | 1.02  | 4.81E-<br>01 |
| ENSG00000115310 | RTN4  | Symbol;Acc:<br>HGNC:1193<br>6]<br>reticulon 4<br>[Source:HG<br>NC                                             | 0.04      | 6.20  | 4.90E-<br>01 |
| ENSG00000033178 | UBA6  | Symbol;Acc:<br>HGNC:1408<br>5]<br>ubiquitin<br>like<br>modifier<br>activating<br>enzyme 6<br>[Source:HG<br>NC | -<br>0.03 | 5.57  | 4.93E-<br>01 |
| ENSG00000113328 | CCNG1 | Symbol;Acc:<br>HGNC:2558<br>1]<br>cyclin G1<br>[Source:HG<br>NC                                               | -<br>0.03 | 7.42  | 4.98E-<br>01 |
| ENSG00000101384 | JAG1  | Symbol;Acc:<br>HGNC:1592]<br>jagged 1<br>[Source:HG<br>NC                                                     | -<br>0.33 | -0.72 | 4.99E-<br>01 |

|                 |         |                                                                                                                   |           |       |              |
|-----------------|---------|-------------------------------------------------------------------------------------------------------------------|-----------|-------|--------------|
| ENSG00000071967 | CYBRD1  | Symbol;Acc:<br>HGNC:6188]<br>cytochrome<br>b reductase<br>1<br>[Source:HG<br>NC<br>Symbol;Acc:<br>HGNC:2079<br>7] | -<br>0.25 | -0.14 | 5.01E-<br>01 |
| ENSG00000083168 | KAT6A   | lysine<br>acetyltransf<br>erase 6A<br>[Source:HG<br>NC<br>Symbol;Acc:<br>HGNC:1301<br>3]                          | -<br>0.02 | 7.15  | 5.07E-<br>01 |
| ENSG00000090863 | GLG1    | golgi<br>glycoprotei<br>n 1<br>[Source:HG<br>NC<br>Symbol;Acc:<br>HGNC:4316]                                      | 0.02      | 7.47  | 5.11E-<br>01 |
| ENSG00000111328 | CDK2AP1 | cyclin<br>dependent<br>kinase 2<br>associated<br>protein 1<br>[Source:HG<br>NC<br>Symbol;Acc:                     | 0.15      | 1.66  | 5.14E-<br>01 |

|                 |        |                                                                                                                                           |           |       |              |
|-----------------|--------|-------------------------------------------------------------------------------------------------------------------------------------------|-----------|-------|--------------|
| ENSG00000198142 | SOWAHC | HGNC:1400<br>2]<br>sosondowa<br>h ankyrin<br>repeat<br>domain<br>family<br>member C<br>[Source:HG<br>NC<br>Symbol;Acc:<br>HGNC:2614<br>9] | 0.18      | 1.61  | 5.16E-<br>01 |
| ENSG00000109654 | TRIM2  | tripartite<br>motif<br>containing 2<br>[Source:HG<br>NC<br>Symbol;Acc:<br>HGNC:1597<br>4]                                                 | 0.11      | 2.37  | 5.19E-<br>01 |
| ENSG00000112242 | E2F3   | E2F<br>transcriptio<br>n factor 3<br>[Source:HG<br>NC<br>Symbol;Acc:<br>HGNC:3115]                                                        | 0.05      | 5.22  | 5.21E-<br>01 |
| ENSG00000159388 | BTG2   | BTG anti-<br>proliferatio<br>n factor 2<br>[Source:HG<br>NC                                                                               | -<br>0.07 | 10.18 | 5.21E-<br>01 |

|                 |               |                                                                                                        |           |      |              |
|-----------------|---------------|--------------------------------------------------------------------------------------------------------|-----------|------|--------------|
| ENSG00000138443 | ABI2          | Symbol;Acc:<br>HGNC:1131]<br>abl<br>interactor 2<br>[Source:HG<br>NC<br>Symbol;Acc:<br>HGNC:2401<br>1] | -<br>0.04 | 5.52 | 5.24E-<br>01 |
| ENSG00000169905 | TOR1AIP2      | torsin 1A<br>interacting<br>protein 2<br>[Source:HG<br>NC<br>Symbol;Acc:<br>HGNC:2405<br>5]            | 0.03      | 3.96 | 5.28E-<br>01 |
| ENSG00000171940 | <b>ZNF217</b> | zinc finger<br>protein 217<br>[Source:HG<br>NC<br>Symbol;Acc:<br>HGNC:1300<br>9]                       | 0.03      | 6.68 | 5.29E-<br>01 |
| ENSG00000099940 | SNAP29        | synaptosom<br>e associated<br>protein 29<br>[Source:HG<br>NC<br>Symbol;Acc:<br>HGNC:1113<br>3]         | -<br>0.04 | 5.41 | 5.35E-<br>01 |
| ENSG00000116918 | TSNAX         | translin                                                                                               | 0.02      | 5.44 | 5.36E-       |

|                 |            |                                                                                           |           |      |          |
|-----------------|------------|-------------------------------------------------------------------------------------------|-----------|------|----------|
|                 |            | associated factor X<br>[Source:HGNC<br>Symbol;Acc:<br>HGNC:12380]                         |           |      | 01       |
| ENSG00000198961 | PJA2       | praja ring finger ubiquitin ligase 2<br>[Source:HGNC<br>Symbol;Acc:<br>HGNC:17481]        | 0.03      | 6.98 | 5.41E-01 |
| ENSG00000157933 | <b>SKI</b> | SKI proto-oncogene<br>[Source:HGNC<br>Symbol;Acc:<br>HGNC:10896]                          | 0.05      | 7.14 | 5.44E-01 |
| ENSG00000104866 | PPP1R37    | protein phosphatase 1 regulatory subunit 37<br>[Source:HGNC<br>Symbol;Acc:<br>HGNC:27607] | -<br>0.04 | 3.62 | 5.53E-01 |

|                 |             |                                                                                                 |           |      |              |
|-----------------|-------------|-------------------------------------------------------------------------------------------------|-----------|------|--------------|
| ENSG00000077684 | JADE1       | jade family<br>PHD finger 1<br>[Source:HG<br>NC<br>Symbol;Acc:<br>HGNC:3002<br>7]               | -<br>0.03 | 5.90 | 5.60E-<br>01 |
| ENSG00000143878 | <b>RHOB</b> | ras homolog<br>family<br>member B<br>[Source:HG<br>NC<br>Symbol;Acc:<br>HGNC:668]               | -<br>0.19 | 5.49 | 5.62E-<br>01 |
| ENSG00000111266 | DUSP16      | dual<br>specificity<br>phosphatas<br>e 16<br>[Source:HG<br>NC<br>Symbol;Acc:<br>HGNC:1790<br>9] | 0.06      | 6.63 | 5.64E-<br>01 |
| ENSG00000135521 | LTV1        | LTV1<br>ribosome<br>biogenesis<br>factor<br>[Source:HG<br>NC<br>Symbol;Acc:<br>HGNC:2117<br>3]  | 0.03      | 6.53 | 5.65E-<br>01 |
| ENSG00000184743 | ATL3        | atlastin                                                                                        | 0.03      | 5.11 | 5.65E-       |

|                 |              |                                                                                                                      |           |      |        |    |
|-----------------|--------------|----------------------------------------------------------------------------------------------------------------------|-----------|------|--------|----|
|                 |              | GTPase 3<br>[Source:HG<br>NC<br>Symbol;Acc:<br>HGNC:2452<br>6]                                                       |           |      |        | 01 |
| ENSG00000163939 | <b>PBRM1</b> | polybromo<br>1<br>[Source:HG<br>NC<br>Symbol;Acc:<br>HGNC:3006<br>4]                                                 | -<br>0.02 | 5.89 | 5.65E- | 01 |
| ENSG00000151413 | NUBPL        | nucleotide<br>binding<br>protein like<br>[Source:HG<br>NC<br>Symbol;Acc:<br>HGNC:2027<br>8]                          | 0.04      | 2.87 | 5.70E- | 01 |
| ENSG00000163125 | RPRD2        | regulation<br>of nuclear<br>pre-mRNA<br>domain<br>containing 2<br>[Source:HG<br>NC<br>Symbol;Acc:<br>HGNC:2903<br>9] | -<br>0.02 | 6.12 | 5.70E- | 01 |
| ENSG00000140396 | NCOA2        | nuclear<br>receptor                                                                                                  | 0.03      | 5.86 | 5.75E- | 01 |



|                 |               |                                                                                                                                                                              |           |      |              |
|-----------------|---------------|------------------------------------------------------------------------------------------------------------------------------------------------------------------------------|-----------|------|--------------|
| ENSG00000165572 | <b>KBTBD6</b> | coactivator<br>2<br>[Source:HG<br>NC<br>Symbol;Acc:<br>HGNC:7669]<br>kelch repeat<br>and BTB<br>domain<br>containing 6<br>[Source:HG<br>NC<br>Symbol;Acc:<br>HGNC:2534<br>0] | -<br>0.05 | 2.93 | 5.77E-<br>01 |
| ENSG00000184007 | PTP4A2        | protein<br>tyrosine<br>phosphatas<br>e type IVA,<br>member 2<br>[Source:HG<br>NC<br>Symbol;Acc:<br>HGNC:9635]                                                                | 0.03      | 8.12 | 5.77E-<br>01 |
| ENSG00000172175 | MALT1         | MALT1<br>paracaspase<br>[Source:HG<br>NC<br>Symbol;Acc:<br>HGNC:6819]                                                                                                        | -<br>0.02 | 7.30 | 5.77E-<br>01 |
| ENSG00000115159 | GPD2          | glycerol-3-<br>phosphate<br>dehydrogen                                                                                                                                       | 0.04      | 4.12 | 5.83E-<br>01 |

|                 |         |                                                                                                                                  |           |      |          |
|-----------------|---------|----------------------------------------------------------------------------------------------------------------------------------|-----------|------|----------|
| ENSG00000112697 | TMEM30A | ase 2<br>[Source:HGNC<br>Symbol;Acc:<br>HGNC:4456]<br>transmembrane protein<br>30A<br>[Source:HGNC<br>Symbol;Acc:<br>HGNC:16667] | 0.02      | 7.15 | 5.85E-01 |
| ENSG00000083312 | TNPO1   | transportin<br>1<br>[Source:HGNC<br>Symbol;Acc:<br>HGNC:6401]                                                                    | -<br>0.02 | 6.04 | 5.86E-01 |
| ENSG00000166483 | WEE1    | WEE1 G2<br>checkpoint<br>kinase<br>[Source:HGNC<br>Symbol;Acc:<br>HGNC:12761]                                                    | -<br>0.09 | 2.26 | 5.90E-01 |
| ENSG00000070759 | TESK2   | testis-specific<br>kinase 2<br>[Source:HGNC<br>Symbol;Acc:                                                                       | 0.05      | 3.95 | 5.91E-01 |

|                 |        |                                                                                                                                                     |           |      |              |
|-----------------|--------|-----------------------------------------------------------------------------------------------------------------------------------------------------|-----------|------|--------------|
| ENSG00000153914 | SREK1  | HGNC:1173<br>2]<br>splicing<br>regulatory<br>glutamic<br>acid and<br>lysine rich<br>protein 1<br>[Source:HG<br>NC<br>Symbol;Acc:<br>HGNC:1788<br>2] | 0.02      | 6.57 | 5.92E-<br>01 |
| ENSG00000120137 | PANK3  | pantothenat<br>e kinase 3<br>[Source:HG<br>NC<br>Symbol;Acc:<br>HGNC:1936<br>5]                                                                     | 0.02      | 6.15 | 5.95E-<br>01 |
| ENSG00000102401 | ARMCX3 | armadillo<br>repeat<br>containing,<br>X-linked 3<br>[Source:HG<br>NC<br>Symbol;Acc:<br>HGNC:2406<br>5]                                              | -<br>0.03 | 5.47 | 5.96E-<br>01 |
| ENSG00000173674 | EIF1AX | eukaryotic<br>translation<br>initiation<br>factor 1A, X-                                                                                            | -<br>0.08 | 6.96 | 5.99E-<br>01 |

|                 |                |                                                                                                                                       |           |      |          |
|-----------------|----------------|---------------------------------------------------------------------------------------------------------------------------------------|-----------|------|----------|
| ENSG00000257923 | CUX1           | linked<br>[Source:HG<br>NC<br>Symbol;Acc:<br>HGNC:3250]<br>cut like<br>homeobox<br>1<br>[Source:HG<br>NC<br>Symbol;Acc:<br>HGNC:2557] | 0.03      | 4.27 | 5.99E-01 |
| ENSG00000155744 | <b>FAM126B</b> | family with<br>sequence<br>similarity<br>126<br>member B<br>[Source:HG<br>NC<br>Symbol;Acc:<br>HGNC:2859<br>3]                        | 0.03      | 4.63 | 6.01E-01 |
| ENSG00000123836 | PFKFB2         | 6-<br>phosphofru<br>cto-2-<br>kinase/fruct<br>ose-2,6-<br>biphosphata<br>se 2<br>[Source:HG<br>NC<br>Symbol;Acc:<br>HGNC:8873]        | -<br>0.07 | 1.95 | 6.02E-01 |

|                 |        |                                                                                       |           |      |          |
|-----------------|--------|---------------------------------------------------------------------------------------|-----------|------|----------|
| ENSG00000112941 | PAPD7  | poly(A) RNA polymerase D7, non-canonical<br>[Source:HGNC Symbol;Acc:HGNC:16705]       | 0.03      | 6.88 | 6.06E-01 |
| ENSG00000148154 | UGCG   | UDP-glucose ceramide glucosyltransferase<br>[Source:HGNC Symbol;Acc:HGNC:12524]       | 0.05      | 6.21 | 6.09E-01 |
| ENSG00000155189 | AGPAT5 | 1-acylglycerol-3-phosphate O-acyltransferase 5<br>[Source:HGNC Symbol;Acc:HGNC:20886] | 0.03      | 4.39 | 6.14E-01 |
| ENSG00000215301 | DDX3X  | DEAD-box helicase 3,                                                                  | -<br>0.07 | 9.08 | 6.16E-01 |

|                 |              |                                                                                                                                                                        |           |      |              |
|-----------------|--------------|------------------------------------------------------------------------------------------------------------------------------------------------------------------------|-----------|------|--------------|
| ENSG00000196937 | <b>FAM3C</b> | X-linked<br>[Source:HG<br>NC<br>Symbol;Acc:<br>HGNC:2745]<br>family with<br>sequence<br>similarity 3<br>member C<br>[Source:HG<br>NC<br>Symbol;Acc:<br>HGNC:1866<br>4] | 0.04      | 4.85 | 6.18E-<br>01 |
| ENSG00000162909 | CAPN2        | calpain 2<br>[Source:HG<br>NC<br>Symbol;Acc:<br>HGNC:1479]                                                                                                             | -<br>0.04 | 7.66 | 6.19E-<br>01 |
| ENSG00000170348 | TMED10       | transmembr<br>ane p24<br>trafficking<br>protein 10<br>[Source:HG<br>NC<br>Symbol;Acc:<br>HGNC:1699<br>8]                                                               | -<br>0.03 | 7.44 | 6.22E-<br>01 |
| ENSG00000177311 | ZBTB38       | zinc finger<br>and BTB<br>domain<br>containing<br>38                                                                                                                   | -<br>0.05 | 5.16 | 6.25E-<br>01 |

|                 |         |                                                                                                                 |           |      |              |
|-----------------|---------|-----------------------------------------------------------------------------------------------------------------|-----------|------|--------------|
| ENSG00000039319 | ZFYVE16 | [Source:HGNC<br>Symbol;Acc:<br>HGNC:26636]<br>zinc finger<br>FYVE-type<br>containing<br>16                      | -<br>0.02 | 4.16 | 6.28E-<br>01 |
| ENSG00000188215 | DCUN1D3 | [Source:HGNC<br>Symbol;Acc:<br>HGNC:20756]<br>defective in<br>cullin<br>neddylation<br>1 domain<br>containing 3 | -<br>0.04 | 3.16 | 6.29E-<br>01 |
| ENSG00000144674 | GOLGA4  | [Source:HGNC<br>Symbol;Acc:<br>HGNC:28734]<br>golgin A4                                                         | 0.03      | 5.91 | 6.32E-<br>01 |
| ENSG00000177051 | FBXO46  | [Source:HGNC<br>Symbol;Acc:<br>HGNC:4427]<br>F-box<br>protein 46                                                | -<br>0.05 | 5.26 | 6.35E-<br>01 |

|                 |        |                                                                                               |           |      |              |
|-----------------|--------|-----------------------------------------------------------------------------------------------|-----------|------|--------------|
| ENSG00000105856 | HBP1   | Symbol;Acc:<br>HGNC:2506<br>9]<br>HMG-box<br>transcriptio<br>n factor 1<br>[Source:HG<br>NC   | 0.03      | 6.72 | 6.41E-<br>01 |
| ENSG00000117868 | ESYT2  | Symbol;Acc:<br>HGNC:2320<br>0]<br>extended<br>synaptotag<br>min 2<br>[Source:HG<br>NC         | 0.03      | 8.09 | 6.42E-<br>01 |
| ENSG00000145332 | KLHL8  | Symbol;Acc:<br>HGNC:2221<br>1]<br>kelch like<br>family<br>member 8<br>[Source:HG<br>NC        | -<br>0.03 | 4.04 | 6.50E-<br>01 |
| ENSG00000107771 | CCSER2 | Symbol;Acc:<br>HGNC:1864<br>4]<br>coiled-coil<br>serine rich<br>protein 2<br>[Source:HG<br>NC | 0.04      | 6.74 | 6.53E-<br>01 |
|                 |        | Symbol;Acc:                                                                                   |           |      |              |



|                 |        |                                                                                                                                                         |      |      |              |
|-----------------|--------|---------------------------------------------------------------------------------------------------------------------------------------------------------|------|------|--------------|
| ENSG00000112425 | EPM2A  | HGNC:2919<br>7]<br>epilepsy,<br>progressive<br>myoclonus<br>type 2A,<br>Lafora<br>disease<br>(laforin)<br>[Source:HG<br>NC<br>Symbol;Acc:<br>HGNC:3413] | 0.05 | 3.67 | 6.56E-<br>01 |
| ENSG00000120805 | ARL1   | ADP<br>ribosylation<br>factor like<br>GTPase 1<br>[Source:HG<br>NC<br>Symbol;Acc:<br>HGNC:692]                                                          | 0.02 | 5.09 | 6.59E-<br>01 |
| ENSG00000184602 | SNN    | stannin<br>[Source:HG<br>NC<br>Symbol;Acc:<br>HGNC:1114<br>9]                                                                                           | 0.06 | 6.03 | 6.63E-<br>01 |
| ENSG00000130449 | ZSWIM6 | zinc finger<br>SWIM-type<br>containing 6<br>[Source:HG<br>NC<br>Symbol;Acc:                                                                             | 0.03 | 5.09 | 6.64E-<br>01 |

|                 |       |                                                                                                               |           |      |              |
|-----------------|-------|---------------------------------------------------------------------------------------------------------------|-----------|------|--------------|
| ENSG00000175582 | RAB6A | HGNC:29316]<br>RAB6A,<br>member<br>RAS<br>oncogene<br>family<br>[Source:HG<br>NC<br>Symbol;Acc:<br>HGNC:9786] | -<br>0.02 | 6.18 | 6.65E-<br>01 |
| ENSG00000076706 | MCAM  | melanoma<br>cell<br>adhesion<br>molecule<br>[Source:HG<br>NC<br>Symbol;Acc:<br>HGNC:6934]                     | -<br>0.13 | 0.02 | 6.66E-<br>01 |
| ENSG00000118579 | MED28 | mediator<br>complex<br>subunit 28<br>[Source:HG<br>NC<br>Symbol;Acc:<br>HGNC:2462<br>8]                       | -<br>0.02 | 6.64 | 6.66E-<br>01 |
| ENSG00000091009 | RBM27 | RNA binding<br>motif<br>protein 27<br>[Source:HG<br>NC<br>Symbol;Acc:                                         | -<br>0.02 | 5.91 | 6.67E-<br>01 |

|                 |              |                                                                                                         |           |      |          |
|-----------------|--------------|---------------------------------------------------------------------------------------------------------|-----------|------|----------|
| ENSG00000153561 | RMND5A       | HGNC:29243]<br>required for meiotic nuclear division 5 homolog A<br>[Source:HGNC Symbol;Acc:HGNC:25850] | 0.02      | 5.69 | 6.75E-01 |
| ENSG00000155096 | AZIN1        | antizyme inhibitor 1<br>[Source:HGNC Symbol;Acc:HGNC:16432]                                             | 0.02      | 6.37 | 6.76E-01 |
| ENSG00000120889 | TNFRSF10B    | TNF receptor superfamily member 10b<br>[Source:HGNC Symbol;Acc:HGNC:11905]                              | -<br>0.03 | 6.27 | 6.77E-01 |
| ENSG00000101972 | <b>STAG2</b> | stromal antigen 2<br>[Source:HGNC                                                                       | 0.01      | 6.93 | 6.78E-01 |

|                 |        |                                                                                                                       |           |       |              |
|-----------------|--------|-----------------------------------------------------------------------------------------------------------------------|-----------|-------|--------------|
| ENSG00000100485 | SOS2   | Symbol;Acc:<br>HGNC:1135<br>5]<br>SOS<br>Ras/Rho<br>guanine<br>nucleotide<br>exchange<br>factor 2<br>[Source:HG<br>NC | 0.02      | 5.66  | 6.79E-<br>01 |
| ENSG00000135655 | USP15  | Symbol;Acc:<br>HGNC:1118<br>8]<br>ubiquitin<br>specific<br>peptidase<br>15<br>[Source:HG<br>NC                        | 0.02      | 7.12  | 6.87E-<br>01 |
| ENSG00000185129 | PURA   | Symbol;Acc:<br>HGNC:1261<br>3]<br>purine rich<br>element<br>binding<br>protein A<br>[Source:HG<br>NC                  | -<br>0.03 | 5.03  | 6.99E-<br>01 |
| ENSG00000148143 | ZNF462 | Symbol;Acc:<br>HGNC:9701]<br>zinc finger<br>protein 462                                                               | 0.16      | -0.06 | 7.08E-<br>01 |

|                 |           |                                                                                                                         |           |      |          |
|-----------------|-----------|-------------------------------------------------------------------------------------------------------------------------|-----------|------|----------|
| ENSG00000183735 | TBK1      | [Source:HGNC<br>Symbol;Acc:<br>HGNC:21684]<br>TANK<br>binding<br>kinase 1                                               | -<br>0.05 | 4.73 | 7.11E-01 |
| ENSG00000122707 | RECK      | [Source:HGNC<br>Symbol;Acc:<br>HGNC:11584]<br>reversion<br>inducing<br>cysteine<br>rich protein<br>with kazal<br>motifs | -<br>0.02 | 4.99 | 7.16E-01 |
| ENSG00000122566 | HNRNPA2B1 | [Source:HGNC<br>Symbol;Acc:<br>HGNC:11345]<br>heterogeneous nuclear<br>ribonucleoprotein<br>A2/B1                       | 0.01      | 9.69 | 7.17E-01 |
|                 |           | [Source:HGNC<br>Symbol;Acc:<br>HGNC:5033]                                                                               |           |      |          |

|                 |               |                                                                                                                   |           |      |              |
|-----------------|---------------|-------------------------------------------------------------------------------------------------------------------|-----------|------|--------------|
| ENSG00000113368 | LMNB1         | lamin B1<br>[Source:HG<br>NC<br>Symbol;Acc:<br>HGNC:6637]                                                         | 0.03      | 5.03 | 7.17E-<br>01 |
| ENSG00000107560 | RAB11FIP2     | RAB11<br>family<br>interacting<br>protein 2<br>[Source:HG<br>NC<br>Symbol;Acc:<br>HGNC:2915<br>2]                 | 0.02      | 5.72 | 7.17E-<br>01 |
| ENSG00000130638 | ATXN10        | ataxin 10<br>[Source:HG<br>NC<br>Symbol;Acc:<br>HGNC:1054<br>9]                                                   | 0.02      | 5.80 | 7.22E-<br>01 |
| ENSG00000095015 | <b>MAP3K1</b> | mitogen-<br>activated<br>protein<br>kinase<br>kinase<br>kinase 1<br>[Source:HG<br>NC<br>Symbol;Acc:<br>HGNC:6848] | 0.03      | 8.20 | 7.24E-<br>01 |
| ENSG00000171150 | SOCS5         | suppressor<br>of cytokine<br>signaling 5                                                                          | -<br>0.02 | 4.54 | 7.31E-<br>01 |

|                 |        |                                                                                   |      |      |          |
|-----------------|--------|-----------------------------------------------------------------------------------|------|------|----------|
| ENSG00000125633 | CCDC93 | [Source:HGNC<br>Symbol;Acc:<br>HGNC:16852]<br>coiled-coil domain containing 93    | 0.01 | 6.25 | 7.34E-01 |
| ENSG00000029993 | HMGB3  | [Source:HGNC<br>Symbol;Acc:<br>HGNC:25611]<br>high mobility group box 3           | 0.11 | 0.70 | 7.37E-01 |
| ENSG00000115808 | STRN   | [Source:HGNC<br>Symbol;Acc:<br>HGNC:5004]<br>striatin                             | 0.01 | 5.74 | 7.54E-01 |
| ENSG00000149792 | MRPL49 | [Source:HGNC<br>Symbol;Acc:<br>HGNC:11424]<br>mitochondrial ribosomal protein L49 | 0.02 | 5.86 | 7.57E-01 |

|                 |      |                                                                                       |           |      |              |
|-----------------|------|---------------------------------------------------------------------------------------|-----------|------|--------------|
| ENSG00000160213 | CSTB | HGNC:1176]<br>cystatin B<br>[Source:HG<br>NC<br>Symbol;Acc:<br>HGNC:2482]             | 0.03      | 5.96 | 7.57E-<br>01 |
| ENSG00000100811 | YY1  | YY1<br>transcriptio<br>n factor<br>[Source:HG<br>NC<br>Symbol;Acc:<br>HGNC:1285<br>6] | 0.01      | 7.09 | 7.59E-<br>01 |
| ENSG00000100345 | MYH9 | myosin<br>heavy chain<br>9<br>[Source:HG<br>NC<br>Symbol;Acc:<br>HGNC:7579]           | -<br>0.02 | 9.63 | 7.59E-<br>01 |
| ENSG00000099194 | SCD  | stearoyl-<br>CoA<br>desaturase<br>[Source:HG<br>NC<br>Symbol;Acc:<br>HGNC:1057<br>1]  | 0.11      | 1.11 | 7.69E-<br>01 |
| ENSG00000102144 | PGK1 | phosphogly<br>cerate<br>kinase 1<br>[Source:HG                                        | 0.01      | 7.52 | 7.74E-<br>01 |



|                 |              |                                                                                                                              |           |      |              |
|-----------------|--------------|------------------------------------------------------------------------------------------------------------------------------|-----------|------|--------------|
| ENSG00000163602 | RYBP         | NC<br>Symbol;Acc:<br>HGNC:8896]<br>RING1 and<br>YY1 binding<br>protein<br>[Source:HG<br>NC<br>Symbol;Acc:<br>HGNC:1048<br>0] | -<br>0.02 | 5.95 | 7.81E-<br>01 |
| ENSG00000113300 | <b>CNOT6</b> | CCR4-NOT<br>transcriptio<br>n complex<br>subunit 6<br>[Source:HG<br>NC<br>Symbol;Acc:<br>HGNC:1409<br>9]                     | 0.02      | 5.64 | 7.85E-<br>01 |
| ENSG00000107099 | DOCK8        | dedicator of<br>cytokinesis<br>8<br>[Source:HG<br>NC<br>Symbol;Acc:<br>HGNC:1919<br>1]                                       | -<br>0.03 | 7.03 | 7.87E-<br>01 |
| ENSG00000136100 | VPS36        | vacuolar<br>protein<br>sorting 36<br>homolog<br>[Source:HG                                                                   | 0.01      | 6.53 | 7.87E-<br>01 |

|                 |        |                                                                                                                                         |           |      |          |
|-----------------|--------|-----------------------------------------------------------------------------------------------------------------------------------------|-----------|------|----------|
| ENSG00000026508 | CD44   | NC<br>Symbol;Acc:<br>HGNC:2031<br>2]<br>CD44<br>molecule<br>(Indian<br>blood<br>group)<br>[Source:HG<br>NC<br>Symbol;Acc:<br>HGNC:1681] | 0.01      | 8.30 | 7.91E-01 |
| ENSG00000170677 | SOCS6  | suppressor<br>of cytokine<br>signaling 6<br>[Source:HG<br>NC<br>Symbol;Acc:<br>HGNC:1683<br>3]                                          | 0.07      | 1.04 | 7.91E-01 |
| ENSG00000120709 | FAM53C | family with<br>sequence<br>similarity 53<br>member C<br>[Source:HG<br>NC<br>Symbol;Acc:<br>HGNC:1336]                                   | -<br>0.02 | 4.73 | 7.97E-01 |
| ENSG00000138663 | COPS4  | COP9<br>signalosome<br>subunit 4<br>[Source:HG                                                                                          | -<br>0.01 | 4.95 | 7.98E-01 |

|                 |         |                                                                                                                        |           |      |              |
|-----------------|---------|------------------------------------------------------------------------------------------------------------------------|-----------|------|--------------|
| ENSG00000101266 | CSNK2A1 | NC<br>Symbol;Acc:<br>HGNC:1670<br>2]<br>casein<br>kinase 2<br>alpha 1<br>[Source:HG<br>NC<br>Symbol;Acc:<br>HGNC:2457] | -<br>0.01 | 6.15 | 7.99E-<br>01 |
| ENSG00000145495 | MARCH6  | membrane<br>associated<br>ring-CH-<br>type finger<br>6<br>[Source:HG<br>NC<br>Symbol;Acc:<br>HGNC:3055<br>0]           | 0.01      | 7.97 | 8.01E-<br>01 |
| ENSG00000156642 | NPTN    | neuroplasti<br>n<br>[Source:HG<br>NC<br>Symbol;Acc:<br>HGNC:1786<br>7]                                                 | 0.02      | 5.93 | 8.03E-<br>01 |
| ENSG00000198642 | KLHL9   | kelch like<br>family<br>member 9<br>[Source:HG<br>NC                                                                   | 0.02      | 5.32 | 8.03E-<br>01 |

|                 |         |                                                                                                                                   |           |      |              |
|-----------------|---------|-----------------------------------------------------------------------------------------------------------------------------------|-----------|------|--------------|
| ENSG00000140443 | IGF1R   | Symbol;Acc:<br>HGNC:1873<br>2]<br>insulin like<br>growth<br>factor 1<br>receptor<br>[Source:HG<br>NC<br>Symbol;Acc:<br>HGNC:5465] | 0.04      | 5.68 | 8.13E-<br>01 |
| ENSG00000075420 | FNDC3B  | fibronectin<br>type III<br>domain<br>containing<br>3B<br>[Source:HG<br>NC<br>Symbol;Acc:<br>HGNC:2467<br>0]                       | 0.02      | 3.71 | 8.15E-<br>01 |
| ENSG00000067955 | CBFB    | core-<br>binding<br>factor beta<br>subunit<br>[Source:HG<br>NC<br>Symbol;Acc:<br>HGNC:1539]                                       | -<br>0.01 | 6.92 | 8.16E-<br>01 |
| ENSG00000136868 | SLC31A1 | solute<br>carrier<br>family 31<br>member 1                                                                                        | 0.03      | 2.77 | 8.16E-<br>01 |

|                 |        |                                                                                |           |      |          |
|-----------------|--------|--------------------------------------------------------------------------------|-----------|------|----------|
| ENSG00000196268 | ZNF493 | [Source:HGNC<br>Symbol;Acc:<br>HGNC:11016]<br>zinc finger protein 493          | 0.02      | 4.63 | 8.19E-01 |
| ENSG00000197312 | DDI2   | [Source:HGNC<br>Symbol;Acc:<br>HGNC:23708]<br>DNA damage inducible 1 homolog 2 | 0.01      | 5.28 | 8.21E-01 |
| ENSG00000001631 | KRIT1  | [Source:HGNC<br>Symbol;Acc:<br>HGNC:24578]<br>KRIT1, ankyrin repeat containing | -<br>0.01 | 5.68 | 8.22E-01 |
| ENSG00000170802 | FOXN2  | [Source:HGNC<br>Symbol;Acc:<br>HGNC:1573]<br>forkhead box N2                   | 0.02      | 6.48 | 8.26E-01 |

|                 |         |                                                                                                       |           |      |              |
|-----------------|---------|-------------------------------------------------------------------------------------------------------|-----------|------|--------------|
| ENSG00000116199 | FAM20B  | Symbol;Acc:<br>HGNC:5281]<br>family with<br>sequence<br>similarity 20<br>member B<br>[Source:HG<br>NC | 0.01      | 5.32 | 8.27E-<br>01 |
| ENSG00000108510 | MED13   | Symbol;Acc:<br>HGNC:2301<br>7]<br>mediator<br>complex<br>subunit 13<br>[Source:HG<br>NC               | 0.01      | 6.02 | 8.31E-<br>01 |
| ENSG00000163848 | ZNF148  | Symbol;Acc:<br>HGNC:2247<br>4]<br>zinc finger<br>protein 148<br>[Source:HG<br>NC                      | 0.01      | 5.56 | 8.32E-<br>01 |
| ENSG00000106723 | SPIN1   | Symbol;Acc:<br>HGNC:1293<br>3]<br>spindlin 1<br>[Source:HG<br>NC                                      | -<br>0.01 | 5.84 | 8.34E-<br>01 |
| ENSG00000144445 | KANSL1L | Symbol;Acc:<br>HGNC:1124<br>3]<br>KAT8                                                                | -         | 3.22 | 8.38E-       |

|                 |               |                                                                                                            |           |      |              |
|-----------------|---------------|------------------------------------------------------------------------------------------------------------|-----------|------|--------------|
|                 |               | regulatory<br>NSL<br>complex<br>subunit 1<br>like<br>[Source:HG<br>NC<br>Symbol;Acc:<br>HGNC:2631<br>0]    | 0.03      |      | 01           |
| ENSG00000128923 | <b>FAM63B</b> | family with<br>sequence<br>similarity 63<br>member B<br>[Source:HG<br>NC<br>Symbol;Acc:<br>HGNC:2695<br>4] | 0.02      | 4.99 | 8.39E-<br>01 |
| ENSG00000175130 | MARCKSL1      | MARCKS<br>like 1<br>[Source:HG<br>NC<br>Symbol;Acc:<br>HGNC:7142]                                          | -<br>0.02 | 6.60 | 8.45E-<br>01 |
| ENSG00000094916 | CBX5          | chromobox<br>5<br>[Source:HG<br>NC<br>Symbol;Acc:<br>HGNC:1555]                                            | 0.01      | 6.29 | 8.47E-<br>01 |
| ENSG00000183044 | ABAT          | 4-<br>aminobutyr                                                                                           | 0.01      | 3.40 | 8.48E-<br>01 |

|                  |        |                                                                                                                                                            |           |      |              |
|------------------|--------|------------------------------------------------------------------------------------------------------------------------------------------------------------|-----------|------|--------------|
| ENSG00000013375  | PGM3   | ate<br>aminotransf<br>er<br>er<br>[Source:HG<br>NC<br>Symbol;Acc:<br>HGNC:23]<br>phosphoglu<br>comutase 3<br>[Source:HG<br>NC<br>Symbol;Acc:<br>HGNC:8907] | 0.01      | 4.44 | 8.49E-<br>01 |
| ENSG00000074201  | CLNS1A | chloride<br>nucleotide-<br>sensitive<br>channel 1A<br>[Source:HG<br>NC<br>Symbol;Acc:<br>HGNC:2080]                                                        | 0.01      | 6.16 | 8.49E-<br>01 |
| ENSG000000169398 | PTK2   | protein<br>tyrosine<br>kinase 2<br>[Source:HG<br>NC<br>Symbol;Acc:<br>HGNC:9611]                                                                           | 0.03      | 2.26 | 8.49E-<br>01 |
| ENSG000000108256 | NUFIP2 | NUFIP2,<br>FMR1<br>interacting<br>protein 2<br>[Source:HG                                                                                                  | -<br>0.01 | 7.11 | 8.64E-<br>01 |



|                 |       |                                                                                                                                |           |      |              |
|-----------------|-------|--------------------------------------------------------------------------------------------------------------------------------|-----------|------|--------------|
| ENSG00000163283 | ALPP  | NC<br>Symbol;Acc:<br>HGNC:1763<br>4]<br>alkaline<br>phosphatas<br>e, placental<br>[Source:HG<br>NC<br>Symbol;Acc:<br>HGNC:439] | -<br>0.05 | 0.81 | 8.68E-<br>01 |
| ENSG00000132294 | EFR3A | EFR3<br>homolog A<br>[Source:HG<br>NC<br>Symbol;Acc:<br>HGNC:2897<br>0]                                                        | 0.01      | 6.14 | 8.70E-<br>01 |
| ENSG00000138069 | RAB1A | RAB1A,<br>member<br>RAS<br>oncogene<br>family<br>[Source:HG<br>NC<br>Symbol;Acc:<br>HGNC:9758]                                 | -<br>0.01 | 6.55 | 8.73E-<br>01 |
| ENSG00000065183 | WDR3  | WD repeat<br>domain 3<br>[Source:HG<br>NC<br>Symbol;Acc:<br>HGNC:1275]                                                         | -<br>0.01 | 5.29 | 8.73E-<br>01 |

|                 |         |                                                                                                                       |           |      |              |
|-----------------|---------|-----------------------------------------------------------------------------------------------------------------------|-----------|------|--------------|
| ENSG00000148835 | TAF5    | 5]<br>TATA-box<br>binding<br>protein<br>associated<br>factor 5<br>[Source:HG<br>NC<br>Symbol;Acc:<br>HGNC:1153<br>9]  | -<br>0.02 | 4.19 | 8.75E-<br>01 |
| ENSG00000119669 | IRF2BPL | interferon<br>regulatory<br>factor 2<br>binding<br>protein like<br>[Source:HG<br>NC<br>Symbol;Acc:<br>HGNC:1428<br>2] | -<br>0.02 | 5.08 | 8.79E-<br>01 |
| ENSG00000135535 | CD164   | CD164<br>molecule<br>[Source:HG<br>NC<br>Symbol;Acc:<br>HGNC:1632]                                                    | -<br>0.01 | 7.54 | 8.80E-<br>01 |
| ENSG00000105887 | MTPN    | myotrophin<br>[Source:HG<br>NC<br>Symbol;Acc:<br>HGNC:1566<br>7]                                                      | -<br>0.01 | 7.32 | 8.82E-<br>01 |

|                 |        |                                                                                                 |           |      |          |
|-----------------|--------|-------------------------------------------------------------------------------------------------|-----------|------|----------|
| ENSG00000131791 | PRKAB2 | protein kinase AMP-activated non-catalytic subunit beta 2<br>[Source:HGNC Symbol;Acc:HGNC:9379] | 0.01      | 5.80 | 8.84E-01 |
| ENSG00000056586 | RC3H2  | ring finger and CCCH-type domains 2<br>[Source:HGNC Symbol;Acc:HGNC:21461]                      | 0.01      | 6.01 | 8.86E-01 |
| ENSG00000057757 | PITHD1 | PITH domain containing 1<br>[Source:HGNC Symbol;Acc:HGNC:25022]                                 | -<br>0.01 | 6.57 | 8.87E-01 |
| ENSG00000113387 | SUB1   | SUB1 homolog, transcriptional regulator                                                         | -<br>0.01 | 6.56 | 8.89E-01 |

|                 |               |                                                                                   |           |      |          |
|-----------------|---------------|-----------------------------------------------------------------------------------|-----------|------|----------|
| ENSG00000048544 | MRPS10        | [Source:HGNC<br>Symbol;Acc:<br>HGNC:19985]<br>mitochondrial ribosomal protein S10 | -<br>0.01 | 5.78 | 8.91E-01 |
| ENSG00000138081 | <b>FBXO11</b> | [Source:HGNC<br>Symbol;Acc:<br>HGNC:14502]<br>F-box protein 11                    | 0.00      | 6.64 | 8.93E-01 |
| ENSG00000112902 | SEMA5A        | [Source:HGNC<br>Symbol;Acc:<br>HGNC:13590]<br>semaphorin 5A                       | -<br>0.04 | 1.13 | 8.98E-01 |
| ENSG00000083099 | LYRM2         | [Source:HGNC<br>Symbol;Acc:<br>HGNC:25226]<br>LYR motif containing 2              | -<br>0.01 | 3.78 | 9.01E-01 |

|                 |        |                                                                                                   |           |      |              |
|-----------------|--------|---------------------------------------------------------------------------------------------------|-----------|------|--------------|
| ENSG00000122335 | SERAC1 | 9]<br>serine<br>active site<br>containing 1<br>[Source:HG<br>NC<br>Symbol;Acc:<br>HGNC:2106<br>1] | -<br>0.01 | 2.92 | 9.08E-<br>01 |
| ENSG00000155962 | CLIC2  | chloride<br>intracellular<br>channel 2<br>[Source:HG<br>NC<br>Symbol;Acc:<br>HGNC:2063]           | -<br>0.03 | 0.90 | 9.22E-<br>01 |
| ENSG00000162607 | USP1   | ubiquitin<br>specific<br>peptidase 1<br>[Source:HG<br>NC<br>Symbol;Acc:<br>HGNC:1260<br>7]        | 0.01      | 6.53 | 9.27E-<br>01 |
| ENSG00000170242 | USP47  | ubiquitin<br>specific<br>peptidase<br>47<br>[Source:HG<br>NC<br>Symbol;Acc:<br>HGNC:2007<br>6]    | 0.00      | 6.01 | 9.27E-<br>01 |

|                 |                 |                                                                                                            |           |      |          |
|-----------------|-----------------|------------------------------------------------------------------------------------------------------------|-----------|------|----------|
| ENSG00000102554 | KLF5            | Kruppel like factor 5<br>[Source:HGNC<br>Symbol;Acc:<br>HGNC:6349]                                         | -<br>0.02 | 2.89 | 9.34E-01 |
| ENSG00000142634 | EFHD2           | EF-hand domain family member D2<br>[Source:HGNC<br>Symbol;Acc:<br>HGNC:28670]                              | -<br>0.02 | 6.91 | 9.37E-01 |
| ENSG00000148730 | <b>EIF4EBP2</b> | eukaryotic translation initiation factor 4E binding protein 2<br>[Source:HGNC<br>Symbol;Acc:<br>HGNC:3289] | 0.00      | 7.12 | 9.40E-01 |
| ENSG00000166681 | BEX3            | brain expressed X-linked 3<br>[Source:HGNC<br>Symbol;Acc:<br>HGNC:13388]                                   | 0.01      | 5.63 | 9.49E-01 |

|                 |           |                                                                                    |      |      |          |
|-----------------|-----------|------------------------------------------------------------------------------------|------|------|----------|
| ENSG00000111647 | UHRF1BP1L | UHRF1 binding protein 1 like<br>[Source:HGNC Symbol;Acc:HGNC:29102]                | 0.00 | 4.33 | 9.52E-01 |
| ENSG00000085788 | DDHD2     | DDHD domain containing 2<br>[Source:HGNC Symbol;Acc:HGNC:29106]                    | 0.00 | 5.68 | 9.52E-01 |
| ENSG00000147548 | WHSC1L1   | Wolf-Hirschhorn syndrome candidate 1-like 1<br>[Source:HGNC Symbol;Acc:HGNC:12767] | 0.00 | 6.89 | 9.57E-01 |
| ENSG00000070882 | OSBPL3    | oxysterol binding protein like 3<br>[Source:HGNC                                   | 0.00 | 5.73 | 9.61E-01 |

|                 |        |                                                                                                                 |      |      |              |
|-----------------|--------|-----------------------------------------------------------------------------------------------------------------|------|------|--------------|
| ENSG00000059728 | MXD1   | Symbol;Acc:<br>HGNC:1637<br>0]<br>MAX<br>dimerization<br>protein 1<br>[Source:HG<br>NC                          | 0.00 | 4.36 | 9.68E-<br>01 |
| ENSG00000100647 | SUSD6  | Symbol;Acc:<br>HGNC:6761]<br>sushi<br>domain<br>containing 6<br>[Source:HG<br>NC                                | 0.00 | 6.55 | 9.70E-<br>01 |
| ENSG00000123684 | LPGAT1 | Symbol;Acc:<br>HGNC:1995<br>6]<br>lysophosph<br>atidylglycer<br>ol<br>acyltransfer<br>ase 1<br>[Source:HG<br>NC | 0.00 | 5.45 | 9.76E-<br>01 |
| ENSG00000161813 | LARP4  | Symbol;Acc:<br>HGNC:2898<br>5]<br>La<br>ribonucleop<br>rotein<br>domain<br>family                               | 0.00 | 4.77 | 9.79E-<br>01 |



|                 |         |                                                                                                                                          |      |      |          |
|-----------------|---------|------------------------------------------------------------------------------------------------------------------------------------------|------|------|----------|
| ENSG00000114098 | ARMC8   | member 4<br>[Source:HGNC<br>Symbol;Acc:<br>HGNC:24320]<br>armadillo repeat<br>containing 8<br>[Source:HGNC<br>Symbol;Acc:<br>HGNC:24999] | 0.00 | 5.17 | 9.83E-01 |
| ENSG00000177125 | ZBTB34  | zinc finger and BTB domain<br>containing 34<br>[Source:HGNC<br>Symbol;Acc:<br>HGNC:31446]                                                | 0.00 | 3.83 | 9.84E-01 |
| ENSG00000011405 | PIK3C2A | phosphatidylinositol-4-phosphate 3-kinase catalytic subunit type 2 alpha<br>[Source:HGNC                                                 | 0.00 | 5.43 | 9.95E-01 |

|                 |                |                                                                                                 |      |      |              |
|-----------------|----------------|-------------------------------------------------------------------------------------------------|------|------|--------------|
| ENSG00000123091 | RNF11          | Symbol;Acc:<br>HGNC:8971]<br>ring finger<br>protein 11<br>[Source:HG<br>NC                      | 0.00 | 6.45 | 9.96E-<br>01 |
| ENSG00000018189 | RUFY3          | Symbol;Acc:<br>HGNC:1005<br>6]<br>RUN and<br>FYVE<br>domain<br>containing 3<br>[Source:HG<br>NC | 0.00 | 4.73 | 9.96E-<br>01 |
| ENSG00000134198 | TSPAN2         | Symbol;Acc:<br>HGNC:3028<br>5]<br>tetraspanin<br>2<br>[Source:HG<br>NC                          | 0.00 | 4.10 | 9.99E-<br>01 |
| ENSG00000172575 | <b>RASGRP1</b> | Symbol;Acc:<br>HGNC:2065<br>9]<br>RAS guanyl<br>releasing<br>protein 1<br>[Source:HG<br>NC      | 0.00 | 8.41 | 9.99E-<br>01 |
| ENSG00000159399 | HK2            | Symbol;Acc:<br>HGNC:9878]<br>hexokinase                                                         | 0.00 | 3.94 | 1.00E+0      |

|                 |        |                                                                                                                      |   |
|-----------------|--------|----------------------------------------------------------------------------------------------------------------------|---|
|                 |        | 2                                                                                                                    |   |
|                 |        | [Source:HG<br>NC<br>Symbol;Acc:<br>HGNC:4923]                                                                        |   |
| ENSG00000013588 | GPRC5A | G protein-<br>coupled<br>receptor<br>class C<br>group 5<br>member A<br>[Source:HG<br>NC<br>Symbol;Acc:<br>HGNC:9836] | - |
| ENSG00000064042 | LIMCH1 | LIM and<br>calponin<br>homology<br>domains 1<br>[Source:HG<br>NC<br>Symbol;Acc:<br>HGNC:2919<br>1]                   | - |
| ENSG00000078399 | HOXA9  | homeobox<br>A9<br>[Source:HG<br>NC<br>Symbol;Acc:<br>HGNC:5109]                                                      | - |
| ENSG00000079308 | TNS1   | tensin 1<br>[Source:HG<br>NC                                                                                         | - |
|                 |        |                                                                                                                      | 0 |

|                 |         |                                                                                                   |   |
|-----------------|---------|---------------------------------------------------------------------------------------------------|---|
| ENSG00000092969 | TGFB2   | Symbol;Acc:<br>HGNC:1197<br>3]<br>transformin<br>g growth<br>factor beta<br>2<br>[Source:HG<br>NC | - |
| ENSG00000102221 | JADE3   | Symbol;Acc:<br>HGNC:1176<br>8]<br>jade family<br>PHD finger 3<br>[Source:HG<br>NC                 | - |
| ENSG00000104369 | JPH1    | Symbol;Acc:<br>HGNC:2298<br>2]<br>junctophilin<br>1<br>[Source:HG<br>NC                           | - |
| ENSG00000111799 | COL12A1 | Symbol;Acc:<br>HGNC:1420<br>1]<br>collagen<br>type XII<br>alpha 1<br>chain<br>[Source:HG<br>NC    | - |
|                 |         | Symbol;Acc:                                                                                       |   |

|                 |       |                                                                                                                      |   |
|-----------------|-------|----------------------------------------------------------------------------------------------------------------------|---|
| ENSG00000113594 | LIFR  | HGNC:2188]<br>leukemia<br>inhibitory<br>factor<br>receptor<br>alpha<br>[Source:HG<br>NC<br>Symbol;Acc:<br>HGNC:6597] | - |
| ENSG00000114757 | PEX5L | peroxisomal<br>biogenesis<br>factor 5 like<br>[Source:HG<br>NC<br>Symbol;Acc:<br>HGNC:3002<br>4]                     | - |
| ENSG00000115844 | DLX2  | distal-less<br>homeobox<br>2<br>[Source:HG<br>NC<br>Symbol;Acc:<br>HGNC:2915]                                        | - |
| ENSG00000116132 | PRRX1 | paired<br>related<br>homeobox<br>1<br>[Source:HG<br>NC<br>Symbol;Acc:<br>HGNC:9142]                                  | - |

|                 |          |                                                                               |   |
|-----------------|----------|-------------------------------------------------------------------------------|---|
| ENSG00000118946 | PCDH17   | protocadher<br>in 17<br>[Source:HG<br>NC<br>Symbol;Acc:<br>HGNC:1426<br>7]    | - |
| ENSG00000122420 | PTGFR    | prostaglandi<br>n F receptor<br>[Source:HG<br>NC<br>Symbol;Acc:<br>HGNC:9600] | - |
| ENSG00000122778 | KIAA1549 | KIAA1549<br>[Source:HG<br>NC<br>Symbol;Acc:<br>HGNC:2221<br>9]                | - |
| ENSG00000122786 | CALD1    | caldesmon<br>1<br>[Source:HG<br>NC<br>Symbol;Acc:<br>HGNC:1441]               | - |
| ENSG00000125398 | SOX9     | SRY-box 9<br>[Source:HG<br>NC<br>Symbol;Acc:<br>HGNC:1120<br>4]               | - |
| ENSG00000135116 | HRK      | harakiri,<br>BCL2                                                             | - |

|                 |          |                                                                                                                                                |   |
|-----------------|----------|------------------------------------------------------------------------------------------------------------------------------------------------|---|
| ENSG00000135378 | PRRG4    | interacting protein<br>[Source:HGNC<br>Symbol;Acc:<br>HGNC:5185]<br>proline rich and Gla domain 4<br>[Source:HGNC<br>Symbol;Acc:<br>HGNC:3079] | - |
| ENSG00000135862 | LAMC1    | laminin subunit gamma 1<br>[Source:HGNC<br>Symbol;Acc:<br>HGNC:6492]                                                                           | - |
| ENSG00000136634 | IL10     | interleukin 10<br>[Source:HGNC<br>Symbol;Acc:<br>HGNC:5962]                                                                                    | - |
| ENSG00000138639 | ARHGAP24 | Rho GTPase activating protein 24<br>[Source:HGNC<br>Symbol;Acc:                                                                                | - |

|                 |        |                                                                                                                           |
|-----------------|--------|---------------------------------------------------------------------------------------------------------------------------|
| ENSG00000143867 | OSR1   | HGNC:2536<br>1]<br>odd-skipped -<br>related<br>transcription<br>factor 1<br>[Source:HG<br>NC<br>Symbol;Acc:<br>HGNC:8111] |
| ENSG00000151090 | THRB   | thyroid -<br>hormone<br>receptor<br>beta<br>[Source:HG<br>NC<br>Symbol;Acc:<br>HGNC:1179<br>9]                            |
| ENSG00000152078 | TMEM56 | transmembr -<br>ane protein<br>56<br>[Source:HG<br>NC<br>Symbol;Acc:<br>HGNC:2647<br>7]                                   |
| ENSG00000153904 | DDAH1  | dimethylarg -<br>inine<br>dimethylam<br>inohydrolas<br>e 1<br>[Source:HG                                                  |



|                 |         |                                                                                                                             |   |
|-----------------|---------|-----------------------------------------------------------------------------------------------------------------------------|---|
| ENSG00000154380 | ENAH    | NC<br>Symbol;Acc:<br>HGNC:2715]<br>enabled<br>homolog<br>(Drosophila)<br>[Source:HG<br>NC<br>Symbol;Acc:<br>HGNC:1827<br>1] | - |
| ENSG00000159217 | IGF2BP1 | insulin like<br>growth<br>factor 2<br>mRNA<br>binding<br>protein 1<br>[Source:HG<br>NC<br>Symbol;Acc:<br>HGNC:2886<br>6]    | - |
| ENSG00000162407 | PLPP3   | phospholipi<br>d<br>phosphatas<br>e 3<br>[Source:HG<br>NC<br>Symbol;Acc:<br>HGNC:9229]                                      | - |
| ENSG00000162409 | PRKAA2  | protein<br>kinase AMP-<br>activated                                                                                         | - |

|                 |           |                                                                                                                                               |   |
|-----------------|-----------|-----------------------------------------------------------------------------------------------------------------------------------------------|---|
| ENSG00000163293 | NIPAL1    | catalytic subunit alpha 2<br>[Source:HGNC<br>Symbol;Acc:HGNC:9377]<br>NIPA like domain containing 1<br>[Source:HGNC<br>Symbol;Acc:HGNC:27194] | - |
| ENSG00000163637 | PRICKLE2  | prickle planar cell polarity protein 2<br>[Source:HGNC<br>Symbol;Acc:HGNC:20340]                                                              | - |
| ENSG00000164176 | EDIL3     | EGF like repeats and discoidin domains 3<br>[Source:HGNC<br>Symbol;Acc:HGNC:3173]                                                             | - |
| ENSG00000164761 | TNFRSF11B | TNF                                                                                                                                           | - |

|                 |         |                                                                                                     |   |
|-----------------|---------|-----------------------------------------------------------------------------------------------------|---|
|                 |         | receptor<br>superfamily<br>member<br>11b<br>[Source:HG<br>NC<br>Symbol;Acc:<br>HGNC:1190<br>9]      |   |
| ENSG00000165092 | ALDH1A1 | aldehyde<br>dehydrogen<br>ase 1 family<br>member A1<br>[Source:HG<br>NC<br>Symbol;Acc:<br>HGNC:402] | - |
| ENSG00000166444 | ST5     | suppression<br>of<br>tumorigenic<br>ity 5<br>[Source:HG<br>NC<br>Symbol;Acc:<br>HGNC:1135<br>0]     | - |
| ENSG00000169245 | CXCL10  | C-X-C motif<br>chemokine<br>ligand 10<br>[Source:HG<br>NC<br>Symbol;Acc:<br>HGNC:1063]              | - |

|                 |        |                                                                                                                          |   |
|-----------------|--------|--------------------------------------------------------------------------------------------------------------------------|---|
| ENSG00000171714 | ANO5   | 7]<br>anoctamin 5<br>[Source:HG<br>NC<br>Symbol;Acc:<br>HGNC:2733<br>7]                                                  | - |
| ENSG00000172380 | GNG12  | G protein<br>subunit<br>gamma 12<br>[Source:HG<br>NC<br>Symbol;Acc:<br>HGNC:1966<br>3]                                   | - |
| ENSG00000173391 | OLR1   | oxidized low<br>density<br>lipoprotein<br>receptor 1<br>[Source:HG<br>NC<br>Symbol;Acc:<br>HGNC:8133]                    | - |
| ENSG00000176597 | B3GNT5 | UDP-<br>GlcNAc:beta<br>Gal beta-<br>1,3-N-<br>acetylglucos<br>aminyltrans<br>ferase 5<br>[Source:HG<br>NC<br>Symbol;Acc: | - |

|                 |        |                                                                                        |   |
|-----------------|--------|----------------------------------------------------------------------------------------|---|
| ENSG00000180592 | SKIDA1 | HGNC:15684]<br>SKI/DACH domain containing 1<br>[Source:HGNC<br>Symbol;Acc:HGNC:32697]  | - |
| ENSG00000181449 | SOX2   | SRY-box 2<br>[Source:HGNC<br>Symbol;Acc:HGNC:11195]                                    | - |
| ENSG00000182752 | PAPPA  | pappalysin 1<br>[Source:HGNC<br>Symbol;Acc:HGNC:8602]                                  | - |
| ENSG00000186205 | MARC1  | mitochondrial amidoxime reducing component 1<br>[Source:HGNC<br>Symbol;Acc:HGNC:26189] | - |

|                 |          |                                                                                      |   |
|-----------------|----------|--------------------------------------------------------------------------------------|---|
| ENSG00000203727 | SAMD5    | sterile alpha motif domain containing 5<br>[Source:HGNC Symbol;Acc:HGNC:21180]       | - |
| ENSG00000206075 | SERPINB5 | serpin family B member 5<br>[Source:HGNC Symbol;Acc:HGNC:8949]                       | - |
| ENSG00000214736 | TOMM6    | translocase of outer mitochondrial membrane 6<br>[Source:HGNC Symbol;Acc:HGNC:34528] | - |
| ENSG00000222014 | RAB6C    | RAB6C, member RAS oncogene family<br>[Source:HG                                      | - |

|                 |        |                                                                                                                                  |   |
|-----------------|--------|----------------------------------------------------------------------------------------------------------------------------------|---|
| ENSG00000263001 | GTF2I  | NC<br>Symbol;Acc:<br>HGNC:1652<br>5]<br>general<br>transcriptio<br>n factor Iii<br>[Source:HG<br>NC<br>Symbol;Acc:<br>HGNC:4659] | - |
| ENSG00000272602 | ZNF595 | zinc finger<br>protein 595<br>[Source:HG<br>NC<br>Symbol;Acc:<br>HGNC:2719<br>6]                                                 | - |
